# Supplementary material for: Using matrix assisted laser desorption ionisation mass spectrometry combined with machine learning for vaccine authenticity screening
Source: PubMed Central journal article supplement (PMC11358428; doi:10.1038/s41541-024-00946-5), 2024-08-28
Supplement: 41541_2024_946_MOESM1_ESM.pdf [file 41541_2024_946_MOESM1_ESM.pdf]

1 **Supplementary Information**

2

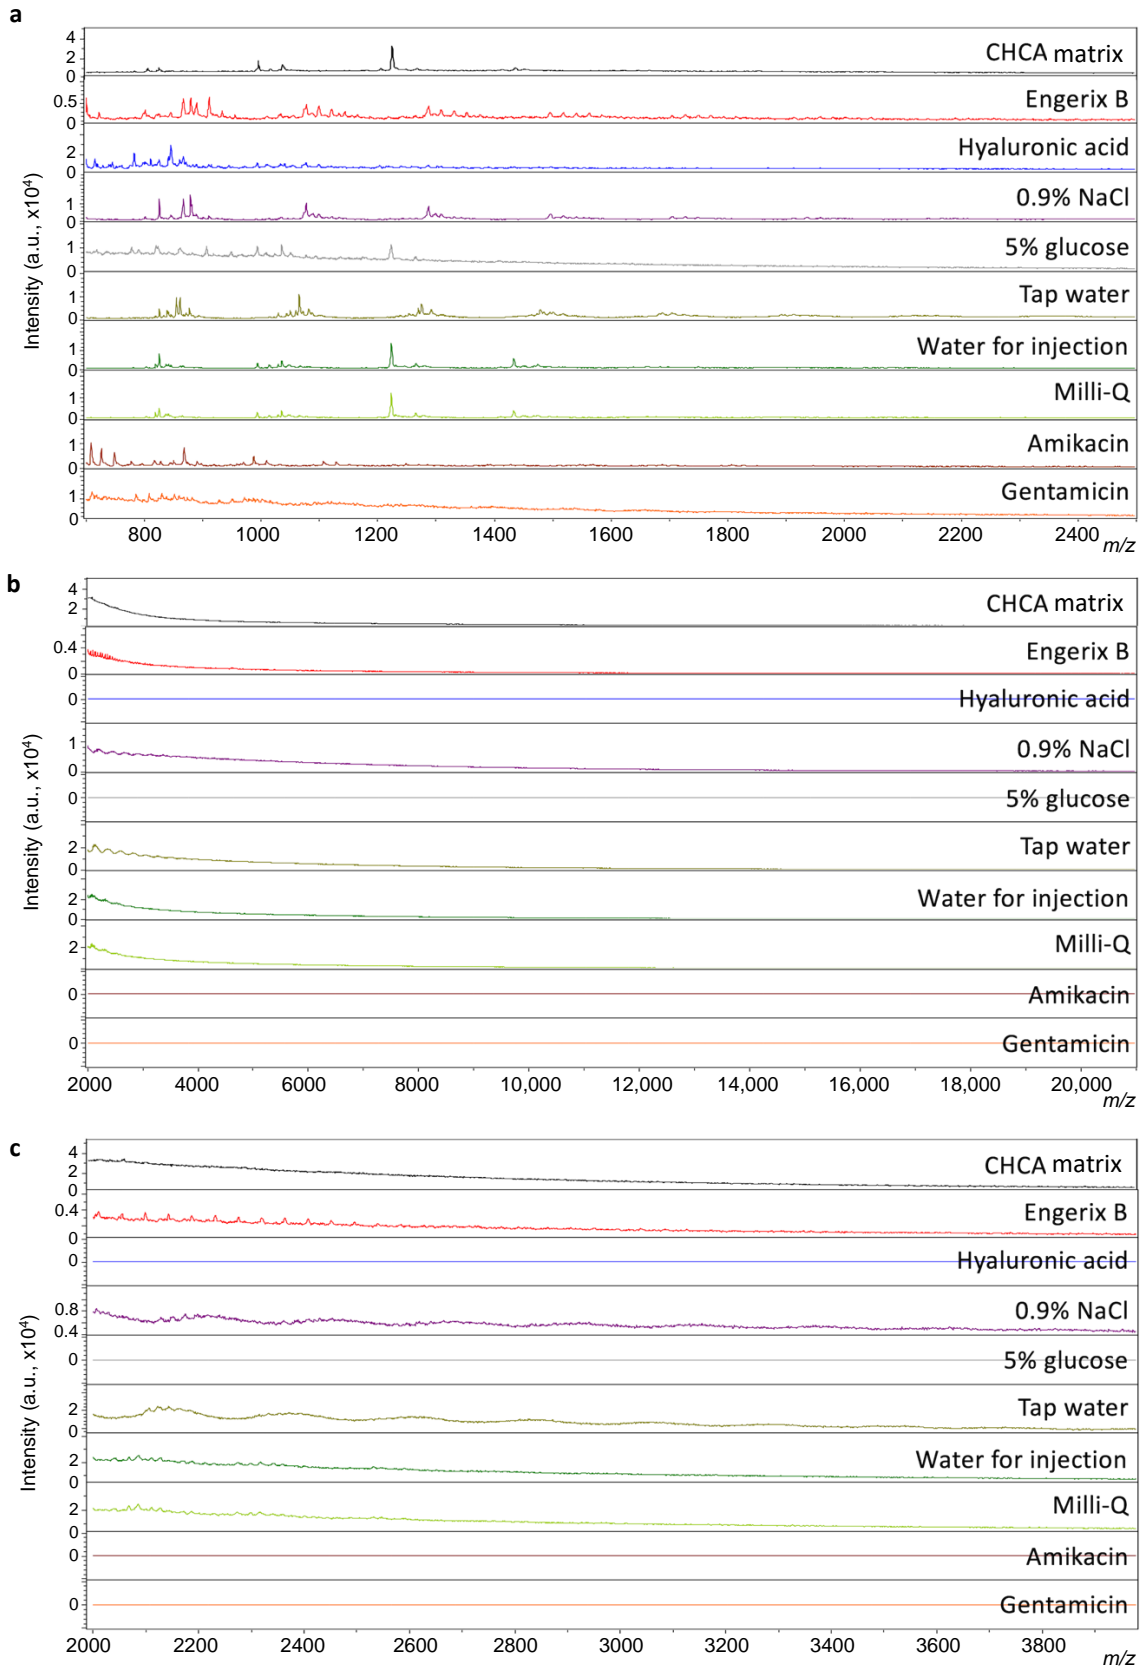

3

4 **Supplementary Figure 1.** Bruker Sirius representative mass spectra for  $\alpha$ -cyano-4-hydroxycinnamic acid (CHCA) matrix,  
5 Engerix B vaccine and 8 samples of other compounds and mixtures previously reported as being constituents of or could be

6 used as 'falsified vaccine' products. (a) 700–2500  $m/z$  mass range. (b) 2000–20,000  $m/z$  mass range. (c) zoomed high mass  
7 range 2000–4000  $m/z$ . Where baseline spectra are present, the instrument failed to detect peaks for those samples at the  
8 given mass range.

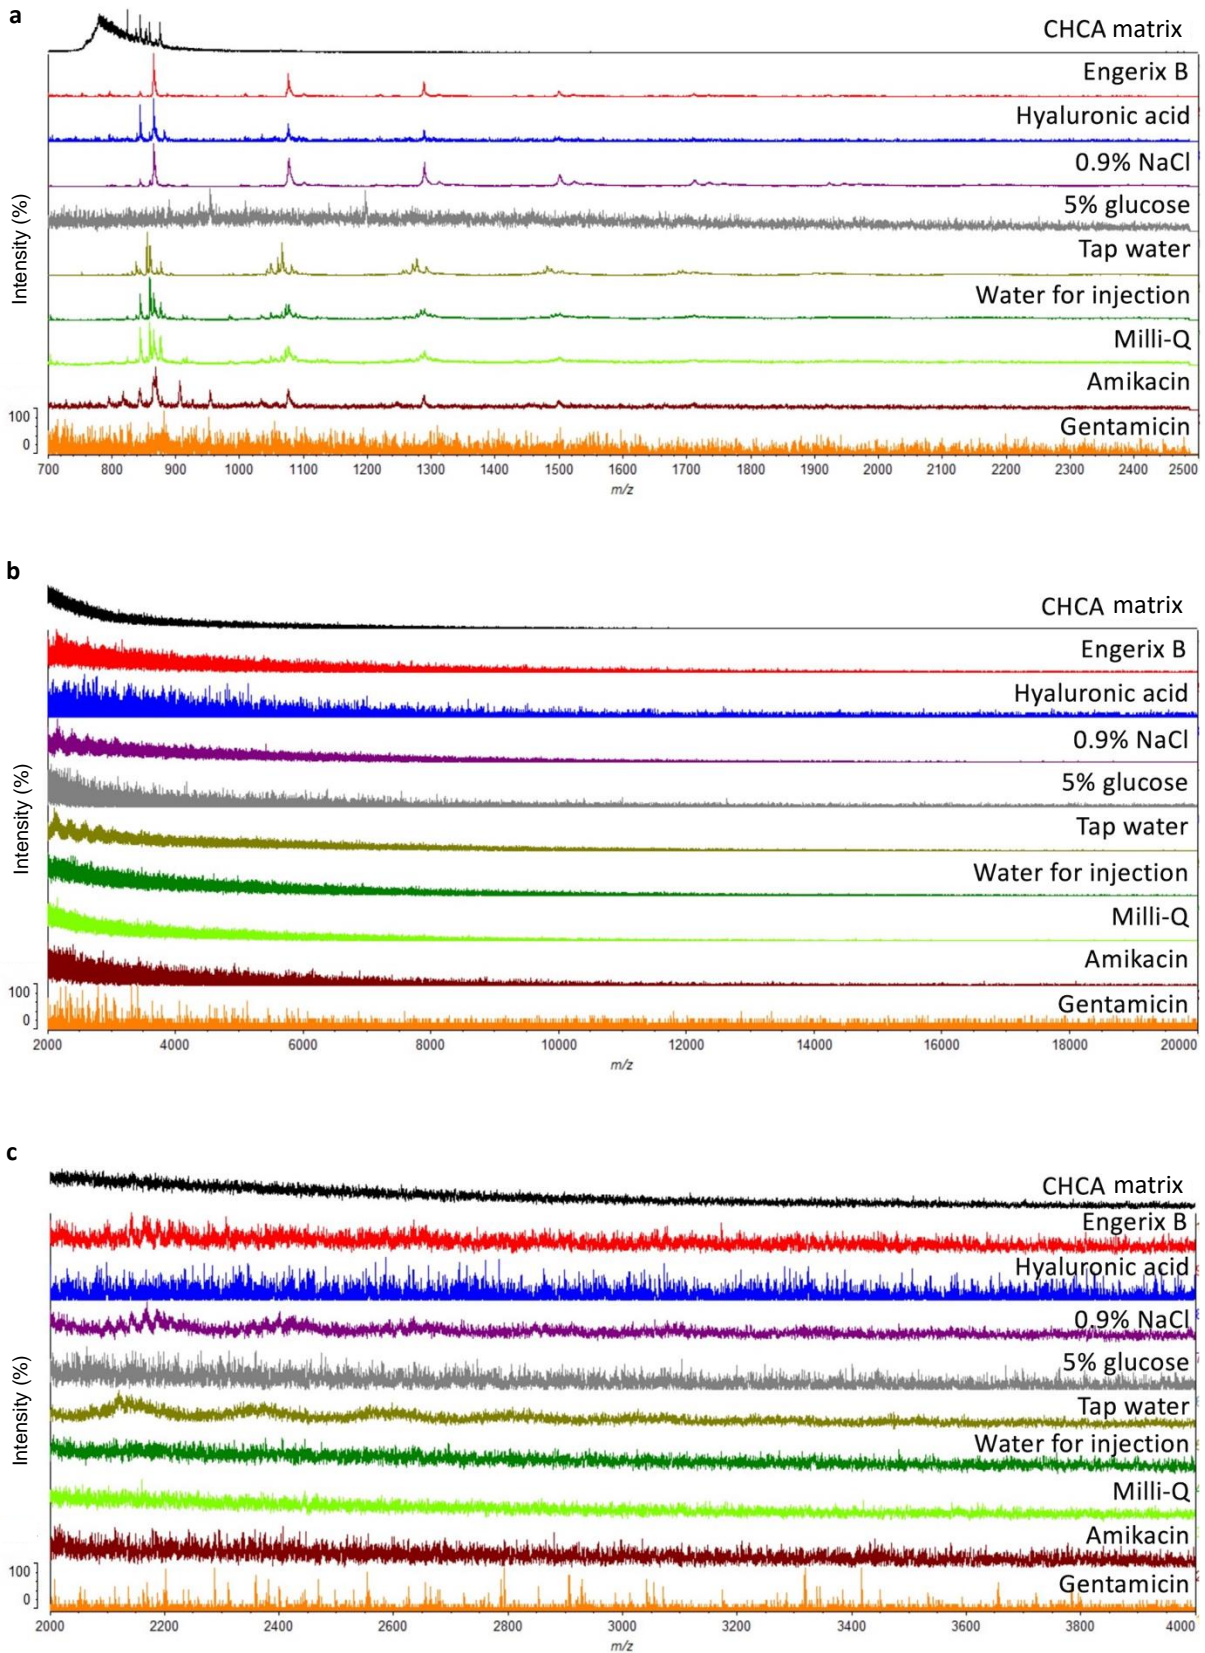

9  
10  
11

**Supplementary Figure 2.** VITEK MS representative mass spectra for  $\alpha$ -cyano-4-hydroxycinnamic acid (CHCA) matrix, Engerix B vaccine and 8 samples of other compounds and mixtures previously reported as being constituents of or could be used as

12 'falsified vaccine' products. (a) 700–2500  $m/z$  mass range. (b) 2000–20,000  $m/z$  mass range. (c) zoomed high mass range  
13 2000–4000  $m/z$ .

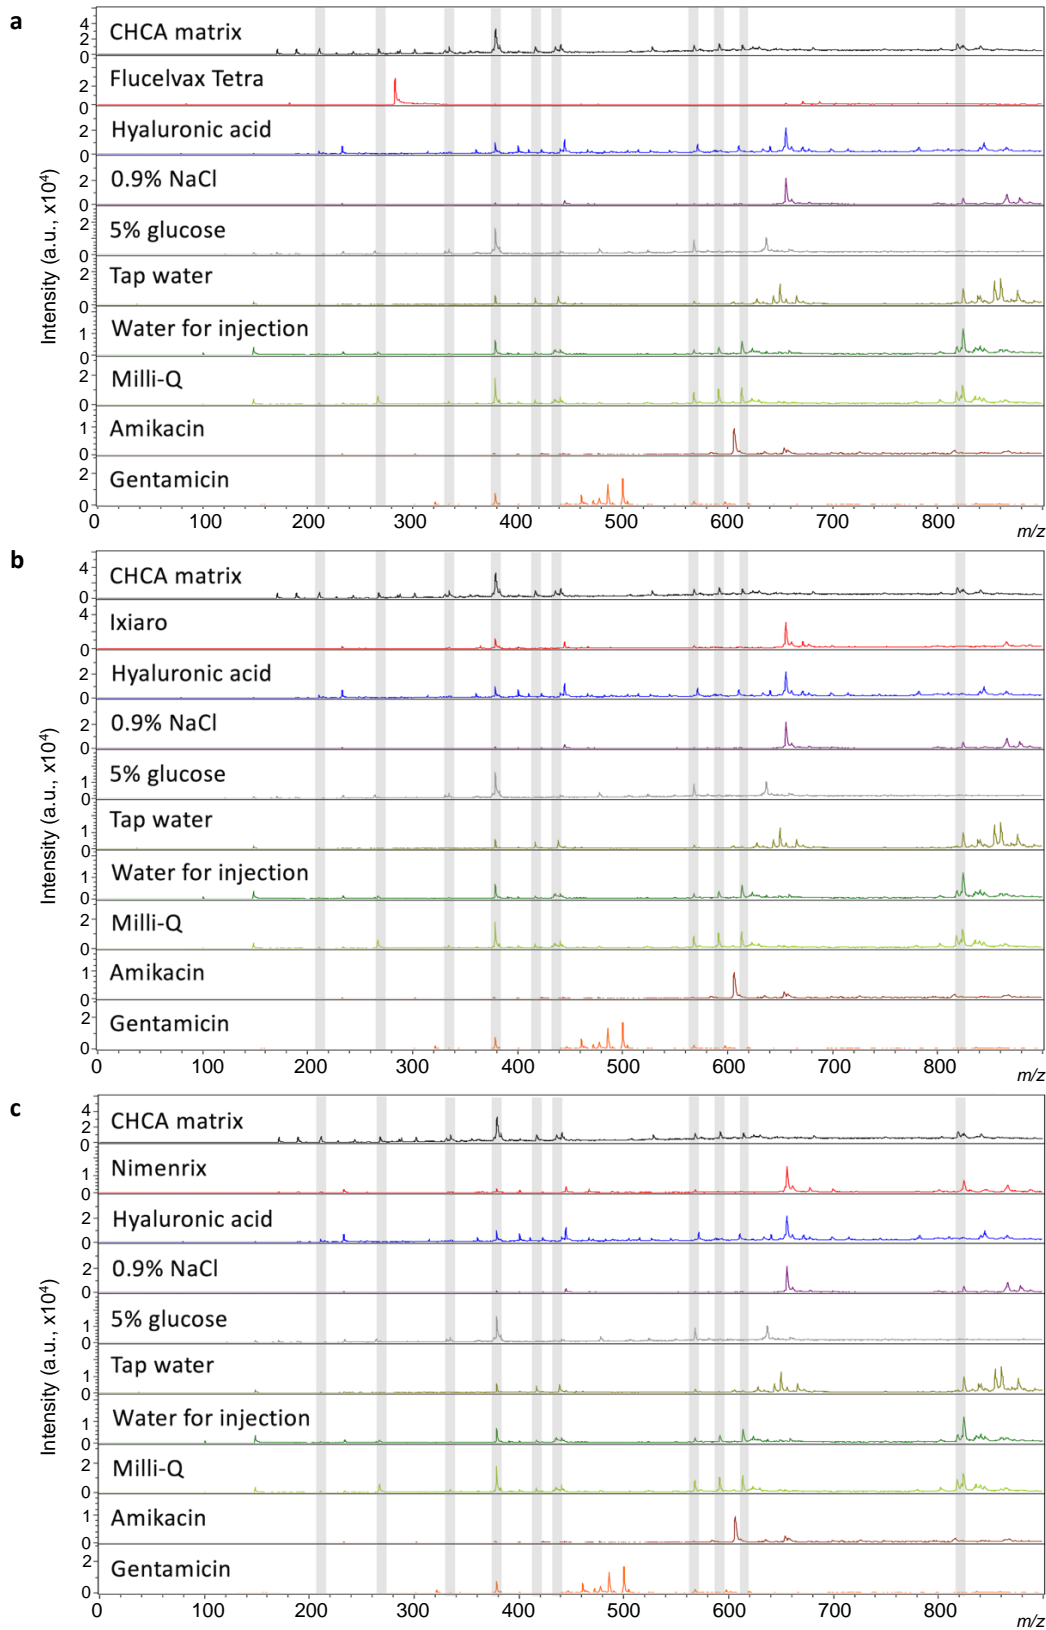

14  
15 **Supplementary Figure 3.** Biotyper Sirius representative mass spectra ( $m/z$  0–900) for  $\alpha$ -cyano-4-hydroxycinnamic acid  
16 (CHCA) matrix, genuine vaccine and 8 samples of other compounds and mixtures previously reported as being constituents  
17 of or could be used as 'falsified vaccine' products. (a) Ixiaro vaccine. (b) Flucelvax Tetra vaccine. (c) Nimenrix vaccine. Where  
18 matrix peaks are present in the sample spectra, these are indicated by the shaded bars. Through the presence, absence, and

19 relative intensity ratios of peaks in the spectra, each genuine vaccine can be distinguished from the falsified constituents by manual inspection.  
20

21

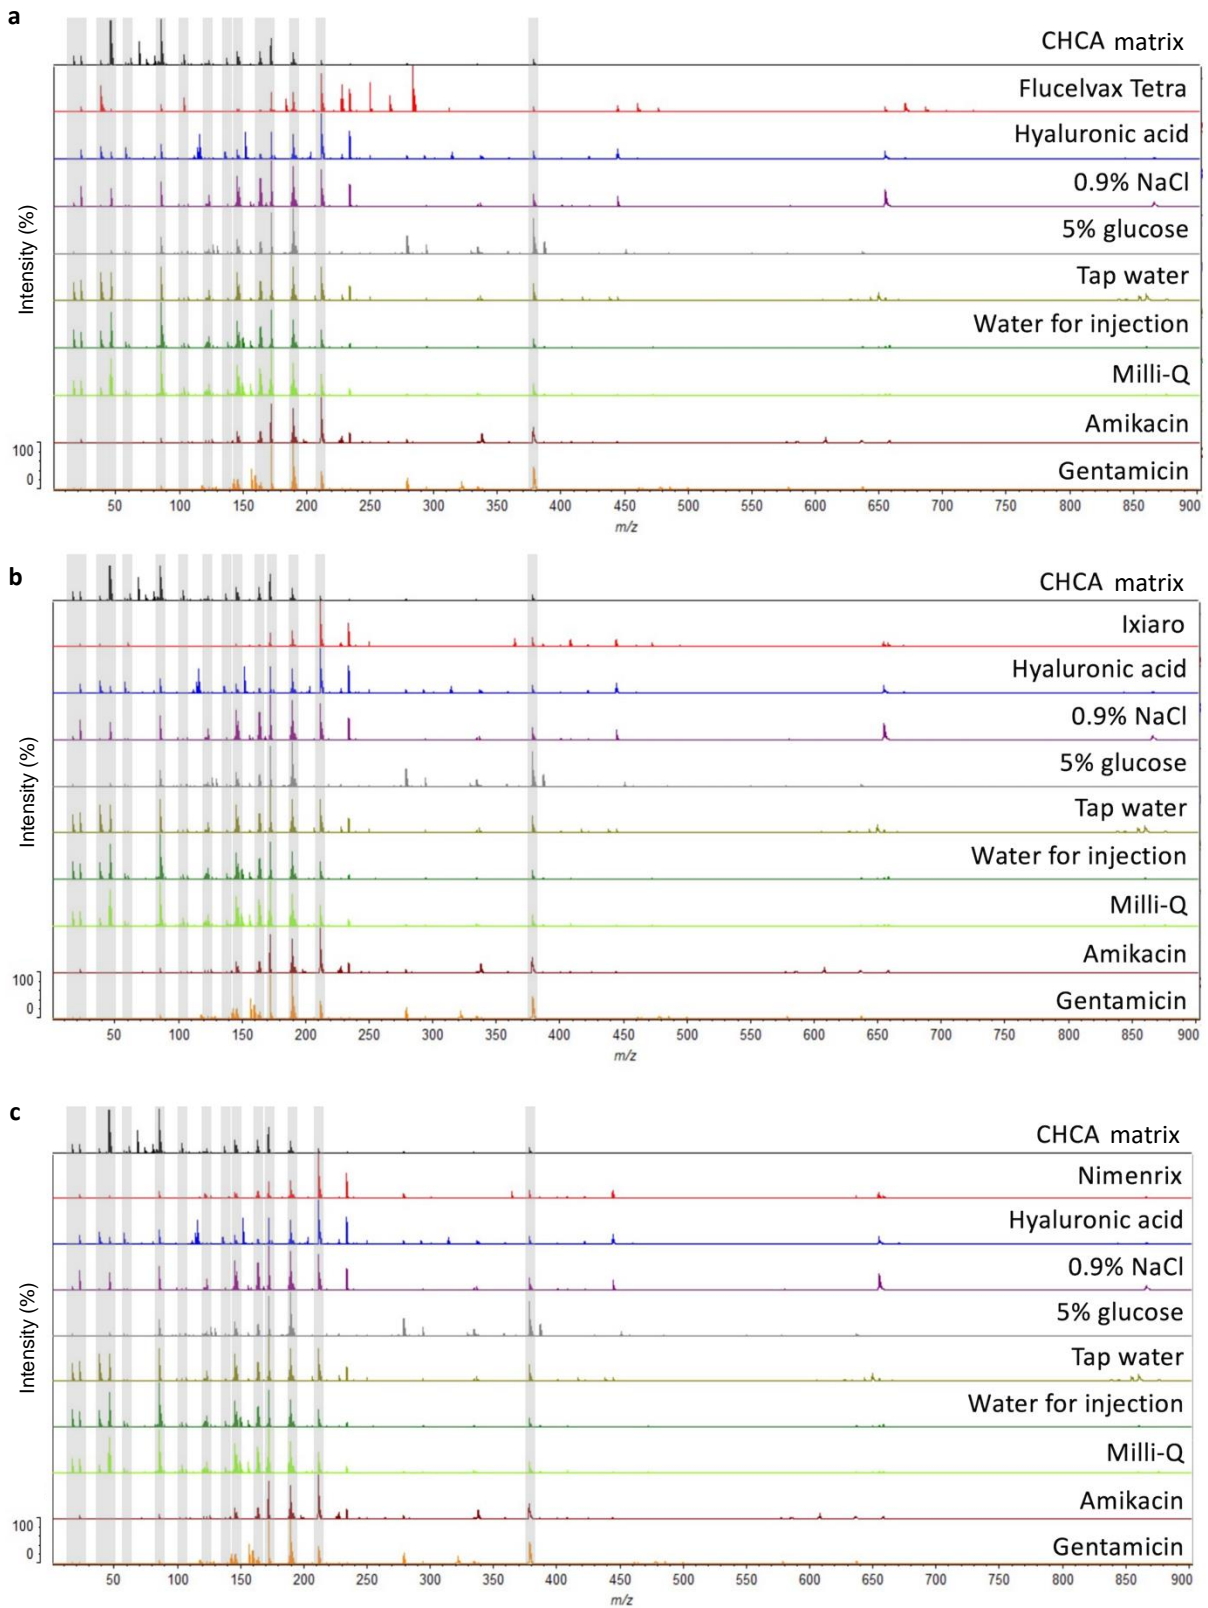

22

23 **Supplementary Figure 4.** VITEK MS representative mass spectra ( $m/z$  0–900) for  $\alpha$ -cyano-4-hydroxycinnamic acid (CHCA)  
24 matrix, genuine vaccine and 8 samples of other compounds and mixtures previously reported as being constituents of or

25 could be used as 'falsified vaccine' products. (a) Ixiaro vaccine. (b) Flucelvax Tetra vaccine. (c) Nimenrix vaccine. Where matrix  
 26 peaks are present in the sample spectra these are indicated by the shaded bars. Through the presence, absence, and relative  
 27 intensity ratios of peaks in the spectra, each genuine vaccine can be distinguished from the falsified constituents by manual  
 28 inspection.

| Sample              | RSD (%) |    |
|---------------------|---------|----|
|                     |         | 29 |
| 0.9% NaCl           | 40.53   | 30 |
| 5% glucose          | 64.28   | 31 |
| Amikacin            | 52.42   | 32 |
| Gentamicin          | 36.49   | 33 |
| Hyaluronic acid     | 28.75   | 34 |
| Tap water           | 18.71   | 35 |
| Milli-Q water       | 9.61    | 36 |
| Water for injection | 24.22   | 37 |
| Engerix B           | 15.90   | 38 |
| Flucelvax Tetra     | 24.34   | 39 |
| Ixiaro              | 49.29   | 40 |
| Nimenrix            | 94.84   | 41 |
| Quality control     | 32.32   |    |

42  
 43 **Supplementary Table 1.** Evaluated reproducibility of the raw data from the VITEK MS (0–900 *m/z*). The percentage relative  
 44 standard deviation (RSD) values calculated from the total ion intensities of all 12 sample replicates and 24 quality control  
 45 replicates are given.

46

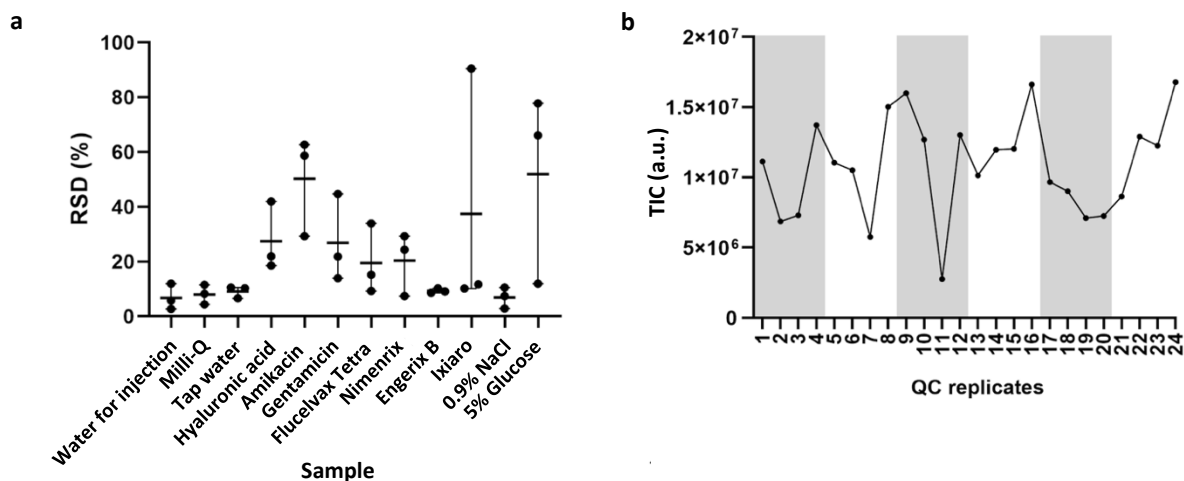

47  
 48  
 49 **Supplementary Figure 5.** Analytical reproducibility for each sample was measured using consecutive replicate analyses.  
 50 VITEK MS data is used for analysis here. (a) The percentage relative standard deviation (RSD) values for each vial per sample  
 51 are plotted showing the range and mean. (b) The total ion count (TIC) for each quality control (QC) sample replicate plotted  
 52 in consecutive run order shows no particular bias (replicates spotted on different MALDI plates are alternately  
 53 shaded/white).

54

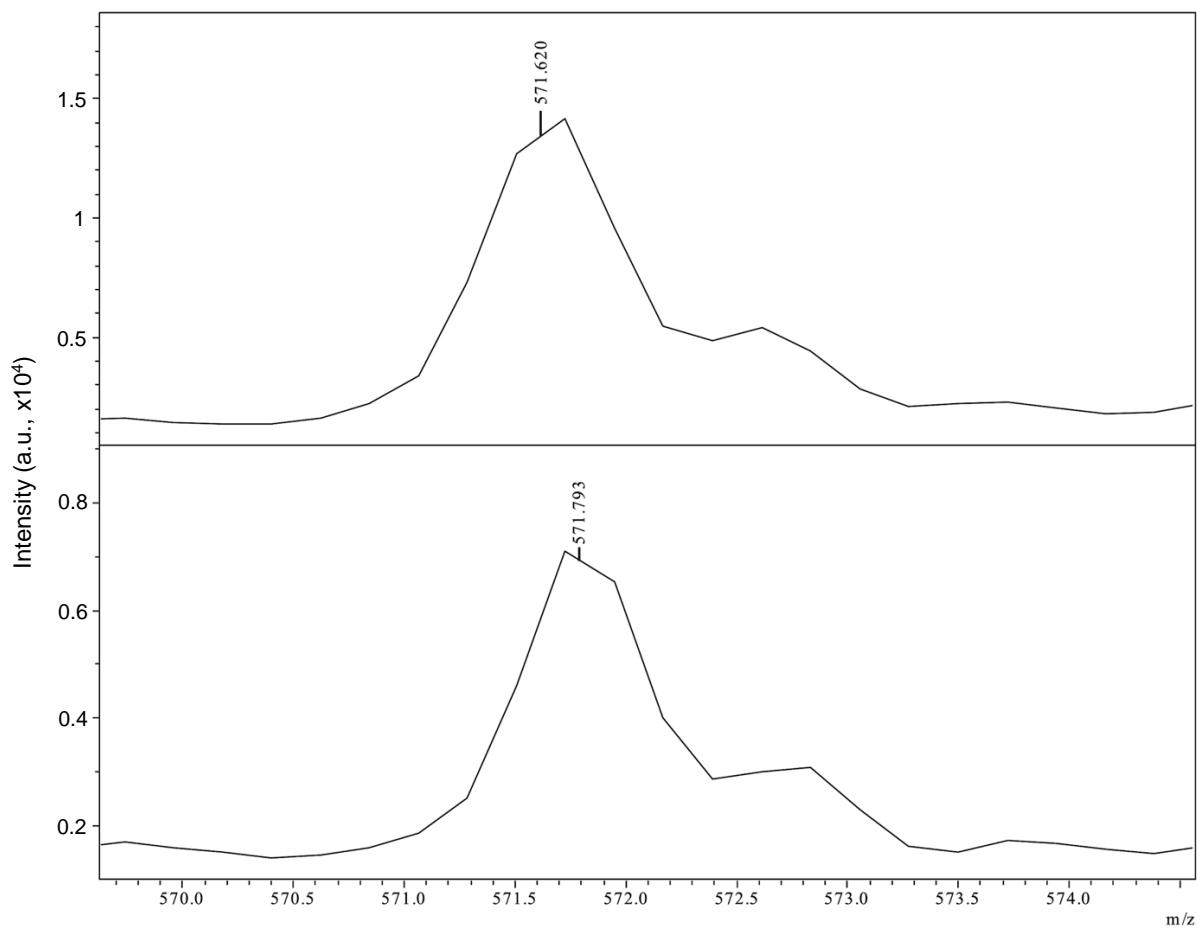

55

56 **Supplementary Figure 6.** Two mass spectra replicates of the same sample showing the centroided  $m/z$  values for a peak at  
57 approximately 572  $m/z$ . The differences in peak shape that can occur between spectra, such as the different peak apex  
58 shapes presented here, can result in different  $m/z$  values being picked for the same peak during processing.

59

| <i>m/z</i> | 0.9% NaCl | 0.9% NaCl | 5% glucose | 5% glucose | Amikacin | Amikacin | Gentamicin | Gentamicin |
|------------|-----------|-----------|------------|------------|----------|----------|------------|------------|
| 586.643    | NA        | NA        | NA         | NA         | NA       | NA       | NA         | NA         |
| 586.867    | NA        | NA        | NA         | NA         | NA       | NA       | NA         | NA         |
| 587.091    | NA        | NA        | NA         | NA         | NA       | NA       | NA         | NA         |
| 587.315    | NA        | NA        | NA         | NA         | NA       | NA       | NA         | NA         |
| 587.540    | NA        | NA        | NA         | NA         | NA       | NA       | NA         | NA         |
| 587.764    | NA        | NA        | NA         | NA         | NA       | NA       | NA         | NA         |
| 587.988    | NA        | NA        | NA         | NA         | NA       | NA       | 0.00584    | 0.00653    |
| 588.213    | NA        | NA        | 0.00213    | 0.00171    | NA       | NA       | NA         | NA         |
| 588.437    | NA        | NA        | NA         | NA         | NA       | NA       | NA         | NA         |
| 588.661    | NA        | NA        | NA         | NA         | NA       | NA       | NA         | NA         |
| 588.886    | NA        | NA        | NA         | NA         | NA       | NA       | NA         | NA         |
| 589.110    | NA        | NA        | NA         | NA         | NA       | NA       | NA         | NA         |
| 589.335    | NA        | NA        | NA         | NA         | NA       | NA       | NA         | NA         |
| 589.560    | NA        | NA        | NA         | NA         | NA       | NA       | NA         | NA         |
| 589.784    | NA        | NA        | NA         | NA         | NA       | NA       | NA         | NA         |
| 590.009    | 0.00263   | 0.00213   | NA         | NA         | NA       | NA       | 0.00238    | 0.00389    |
| 590.234    | NA        | NA        | NA         | NA         | NA       | NA       | NA         | NA         |
| 590.458    | NA        | NA        | NA         | NA         | NA       | NA       | NA         | NA         |
| 590.683    | NA        | NA        | NA         | NA         | NA       | NA       | NA         | NA         |
| 592.015    | NA        | NA        | 0.00296    | 0.00324    | 0.00218  | 0.00159  | 0.00219    | 0.00290    |
| 593.384    | NA        | NA        | NA         | NA         | NA       | NA       | NA         | NA         |
| 593.610    | NA        | NA        | NA         | NA         | NA       | NA       | NA         | NA         |
| 593.835    | 0.0016    | 0.00102   | NA         | NA         | NA       | NA       | NA         | NA         |
| 594.061    | NA        | NA        | NA         | NA         | NA       | NA       | NA         | NA         |
| 594.286    | NA        | NA        | NA         | NA         | NA       | NA       | NA         | NA         |
| 594.512    | NA        | NA        | NA         | NA         | NA       | NA       | NA         | NA         |
| 594.737    | NA        | NA        | NA         | NA         | NA       | NA       | NA         | NA         |

60 NA: no peak intensity detected.

61 **Supplementary Table 2.** Example of data table of results for statistical analysis produced by MALDIquant workflow (Biotyper  
62 Sirius data). Column 1 contains the *m/z* values from peak picking using the MALDIquant workflow. The probabilistic quotient  
63 normalised intensities for each *m/z* for 2 replicates are shown for 0.9% NaCl, 5% glucose, amikacin, and gentamicin. The  
64 table covers the mass range 586.643–594.737 *m/z*.

65

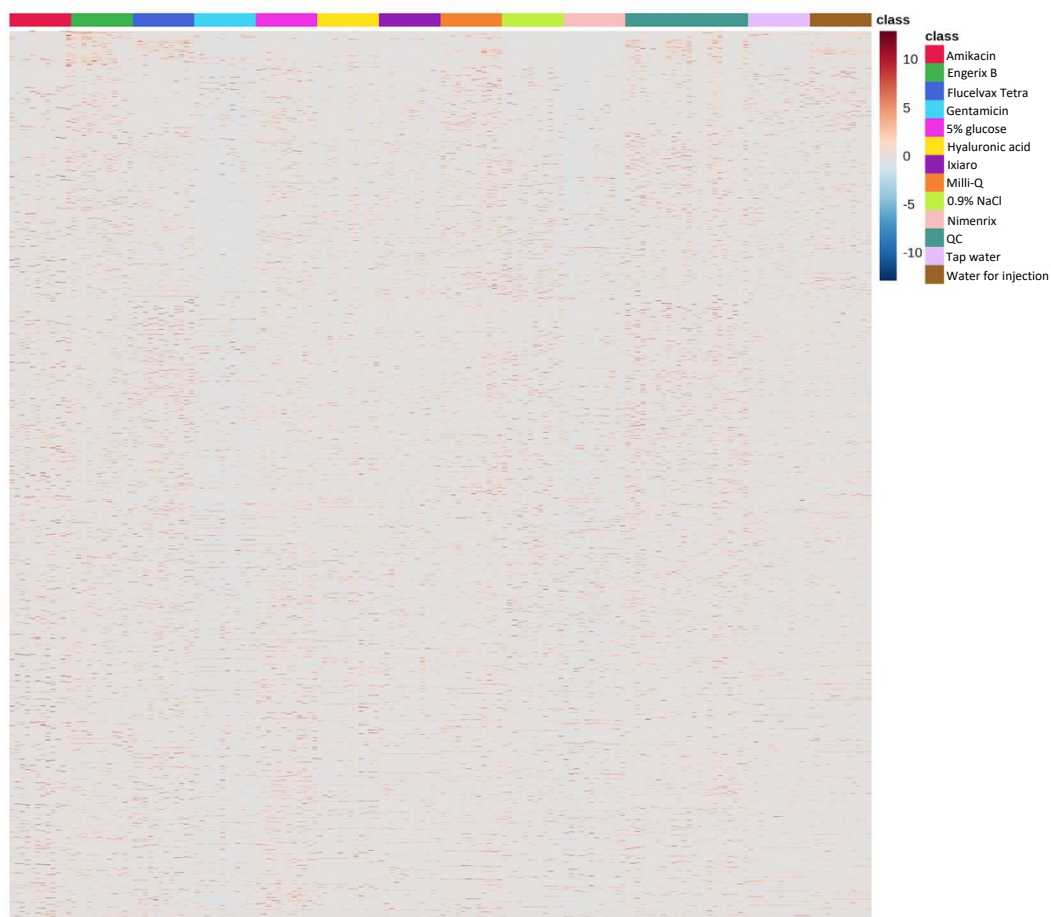

66

67 **Supplementary Figure 7.** Heatmap of all compound-feature intensities across all samples shows no individual samples of  
 68 class outliers after data processing (Bruker Sirius data). The colour groups represent the 12 analytical replicates for each  
 69 sample (columns). Each row represents one of the 3699  $m/z$  features produced via MALDIquant data processing and is colour  
 70 coded red through blue to show relative intensity for the feature for each sample. A stronger red colour corresponds to  
 71 higher relative intensity, whereas stronger blue corresponds to lower relative intensity. QC: quality control.

72



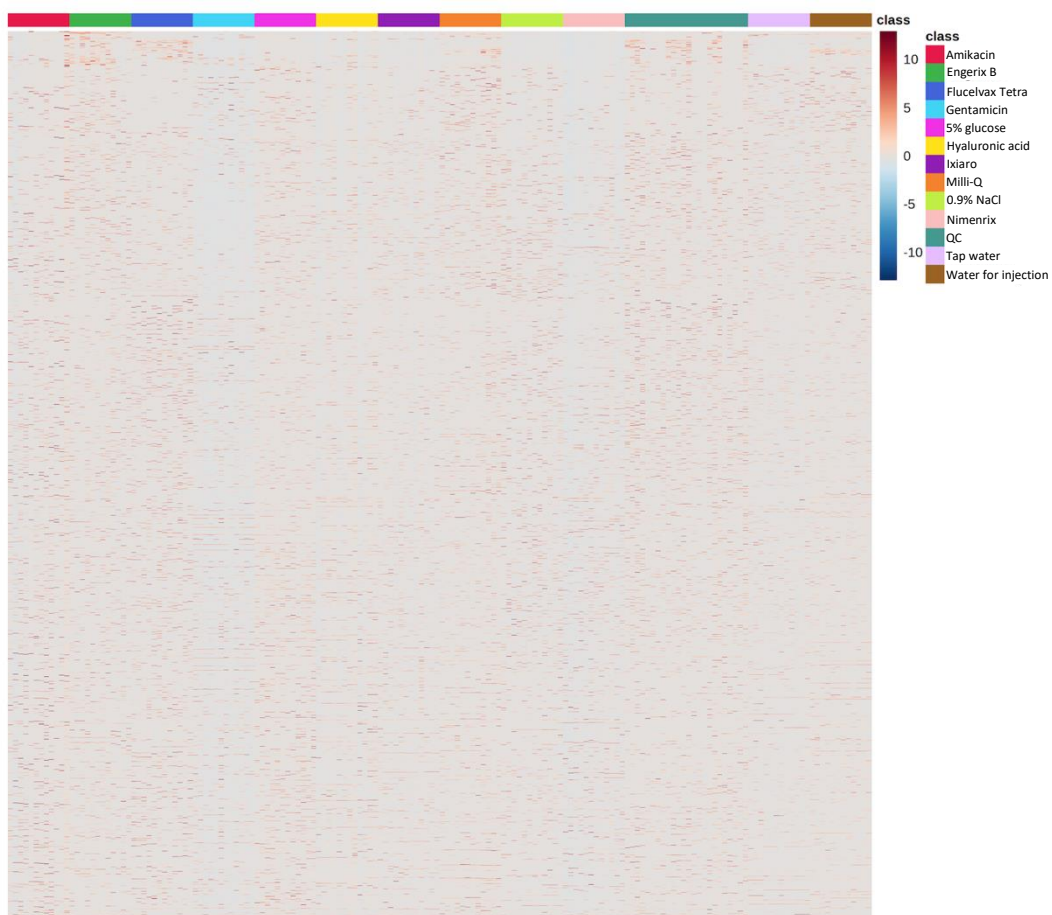

73

74 **Supplementary Figure 8.** Heatmap of all compound-feature intensities across all samples shows no individual samples of  
 75 class outliers after data processing (VITEK MS data). The colour groups represent the 12 analytical replicates for each sample  
 76 (columns). Each row represents one of the 2817  $m/z$  features produced via MALDIquant data processing and is colour coded  
 77 red through blue to show relative intensity for the feature for each sample. A stronger red colour corresponds to higher  
 78 relative intensity, whereas stronger blue corresponds to lower relative intensity. QC: quality control.

79

| Measure  | 1<br>component | 2<br>components | 3<br>components | 4<br>components | 5<br>components | 6<br>components | 7<br>components | 8<br>components |
|----------|----------------|-----------------|-----------------|-----------------|-----------------|-----------------|-----------------|-----------------|
| Accuracy | 0.21422        | 0.36038         | 0.50824         | 0.59574         | 0.77108         | 0.86831         | 0.92724         | 0.98221         |
| R2       | 0.92383        | 0.97765         | 0.98709         | 0.99433         | 0.99716         | 0.99861         | 0.99939         | 0.99969         |
| Q2       | 0.83353        | 0.89795         | 0.90239         | 0.90766         | 0.90694         | 0.9057          | 0.9045          | 0.90402         |

80

81 **Supplementary Table 3.** Cross validation for partial least squares discriminant analysis of Engerix B compared to falsified  
 82 vaccine surrogates (Bruker Sirius, 0–900  $m/z$ ). The numerical values for the performance of accuracy, R-squared (R2), and Q-  
 83 squared (Q2) are displayed for each number of components used.

84

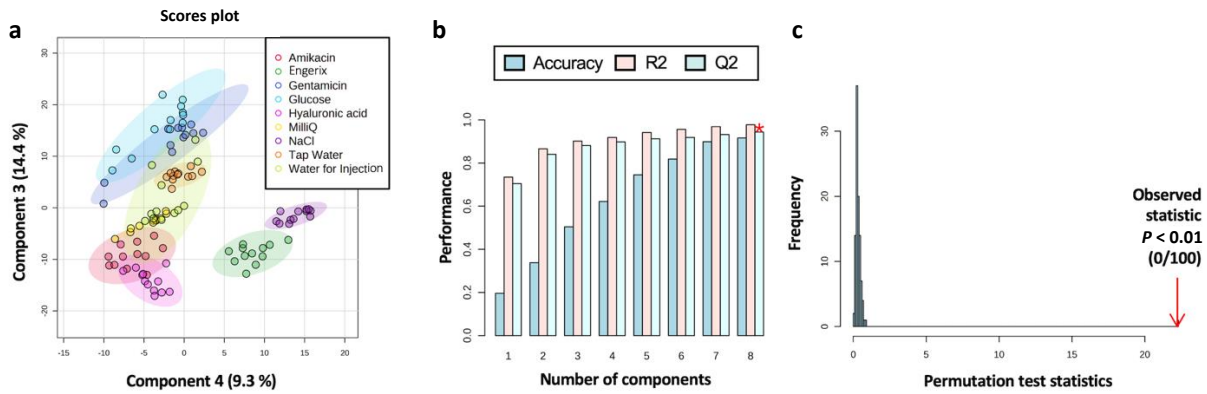

**d**

| Measure  | 1 component | 2 components | 3 components | 4 components | 5 components | 6 components | 7 components | 8 components |
|----------|-------------|--------------|--------------|--------------|--------------|--------------|--------------|--------------|
| Accuracy | 0.19593     | 0.33759      | 0.50391      | 0.62154      | 0.74542      | 0.81798      | 0.89925      | 0.91613      |
| R2       | 0.73441     | 0.86553      | 0.90175      | 0.91863      | 0.94198      | 0.95583      | 0.96912      | 0.97796      |
| Q2       | 0.70408     | 0.84078      | 0.88159      | 0.89829      | 0.91249      | 0.91813      | 0.93179      | 0.94327      |

85

86 **Supplementary Figure 9.** VITEK MS partial least-squares discriminant analysis (PLS-DA) of authentic vaccine Engerix B and  
 87 all falsified vaccine constituents, 0–900 *m/z*. (a) PLS-DA two-dimensional scores plot shows samples group clustering. The  
 88 most discrimination between Engerix B and the falsified constituents was seen between principal components 3 and 4 which  
 89 is shown here. (b) Cross validation shows a minimum of 8 components (mass spectral peaks) are required to differentiate  
 90 the experimental groups for the best Q-squared (Q2) value (shown by \*). The Performance axis indicates the predictive ability  
 91 of the model. (c) Permutation testing showed the model was significant with  $p$ -value  $< 0.01$ . (d) R-squared (R2), Q2 and  
 92 accuracy values for the cross-validation in B.

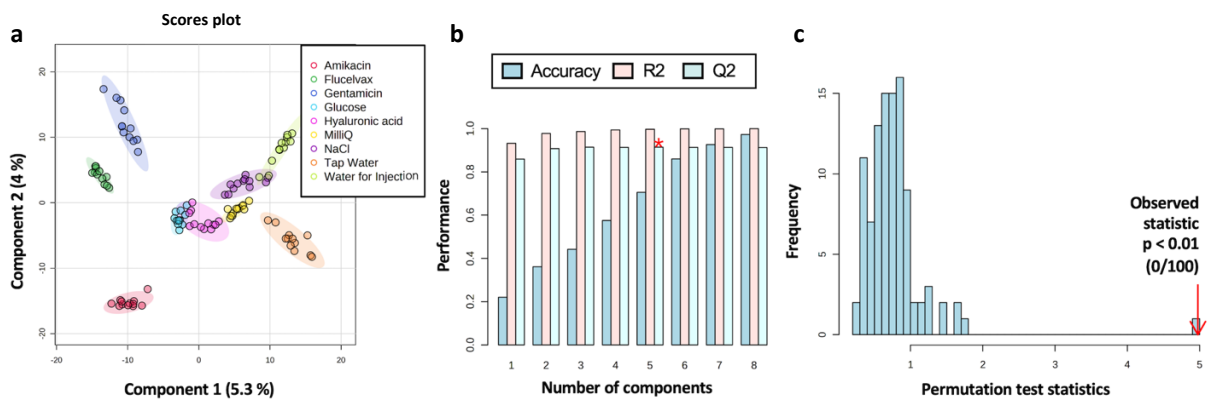

**d**

| Measure  | 1 component | 2 components | 3 components | 4 components | 5 components | 6 components | 7 components | 8 components |
|----------|-------------|--------------|--------------|--------------|--------------|--------------|--------------|--------------|
| Accuracy | 0.21975     | 0.36118      | 0.44146      | 0.57541      | 0.70501      | 0.86035      | 0.92563      | 0.97238      |
| R2       | 0.93212     | 0.97752      | 0.98669      | 0.99436      | 0.99684      | 0.99856      | 0.99941      | 0.99971      |
| Q2       | 0.85902     | 0.90799      | 0.91436      | 0.91382      | 0.91475      | 0.91383      | 0.91374      | 0.91264      |

93

94 **Supplementary Figure 10.** Biolyser Sirius partial least-squares discriminant analysis (PLS-DA) of authentic vaccine Flucelvax  
 95 Tetra and all falsified vaccine constituents. (a) PLS-DA two-dimensional scores plot shows samples group clustering. (b) Cross  
 96 validation shows a minimum of 5 components (mass spectral peaks) are required to differentiate the experimental groups  
 97 for the best Q-squared (Q2) value (shown by \*). The Performance axis indicates the predictive ability of the model. (c)  
 98 Permutation testing showed the model was significant with  $P < 0.01$ . (d) R-squared (R2), Q2 and accuracy values for the  
 99 cross-validation in B.

100

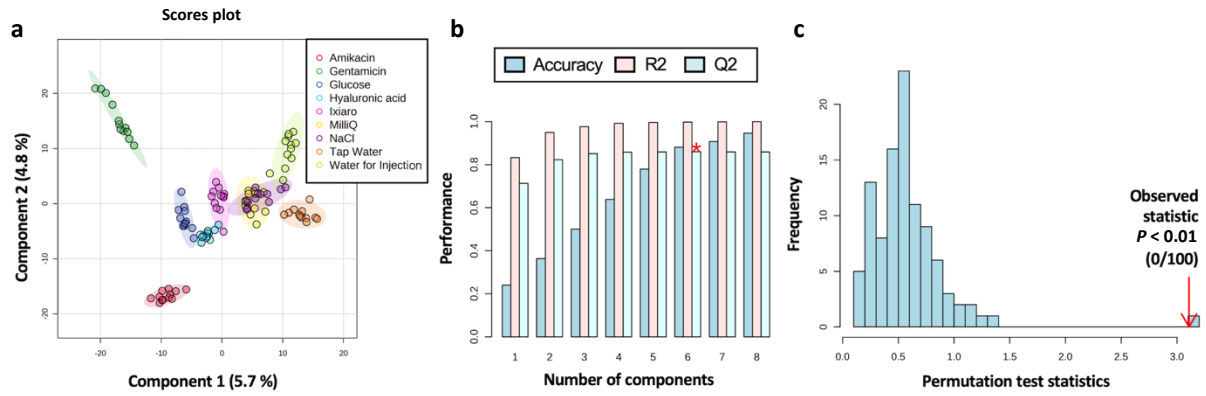

**d**

| Measure  | 1 component | 2 components | 3 components | 4 components | 5 components | 6 components | 7 components | 8 components |
|----------|-------------|--------------|--------------|--------------|--------------|--------------|--------------|--------------|
| Accuracy | 0.23979     | 0.36295      | 0.50002      | 0.63871      | 0.77925      | 0.88103      | 0.90751      | 0.94621      |
| R2       | 0.83308     | 0.94922      | 0.97687      | 0.99201      | 0.99631      | 0.99836      | 0.99913      | 0.99963      |
| Q2       | 0.71354     | 0.82345      | 0.85089      | 0.85836      | 0.85882      | 0.86029      | 0.85859      | 0.85917      |

101

102

103

104

105

106

**Supplementary Figure 11.** Biolyser Sirius partial least-squares discriminant analysis (PLS-DA) of authentic vaccine Ixiaro and all falsified vaccine constituents. (a) PLS-DA two-dimensional scores plot shows samples group clustering. (b) Cross validation shows a minimum of 6 components (mass spectral peaks) are required to differentiate the experimental groups for the best Q-squared (Q2) value (shown by \*). The Performance axis indicates the predictive ability of the model. (c) Permutation testing showed the model was significant with  $P < 0.01$ . (d) R-squared (R2), Q2 and accuracy values for the cross-validation in B.

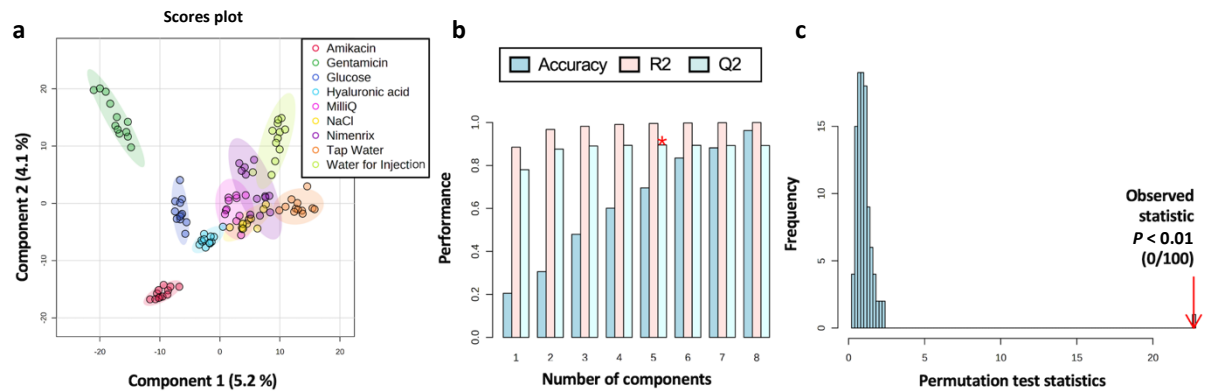

**d**

| Measure  | 1 component | 2 components | 3 components | 4 components | 5 components | 6 components | 7 components | 8 components |
|----------|-------------|--------------|--------------|--------------|--------------|--------------|--------------|--------------|
| Accuracy | 0.2043      | 0.30619      | 0.48002      | 0.60148      | 0.69562      | 0.83483      | 0.8821       | 0.96312      |
| R2       | 0.88508     | 0.9675       | 0.9823       | 0.99153      | 0.99599      | 0.99835      | 0.99927      | 0.99966      |
| Q2       | 0.78019     | 0.87646      | 0.89077      | 0.89394      | 0.89576      | 0.89426      | 0.89334      | 0.89279      |

107

108

109

110

111

112

113

114

**Supplementary Figure 12.** Biolyser Sirius partial least-squares discriminant analysis (PLS-DA) of authentic vaccine Nimenrix and all falsified vaccine constituents. (a) PLS-DA two-dimensional scores plot shows samples group clustering. (b) Cross validation shows a minimum of 5 components (mass spectral peaks) are required to differentiate the experimental groups for the best Q-squared (Q2) value (shown by \*). The Performance axis indicates the predictive ability of the model. (c) Permutation testing showed the model was significant with  $P < 0.01$ . (d) R-squared (R2), Q2 and accuracy values for the cross-validation in B.

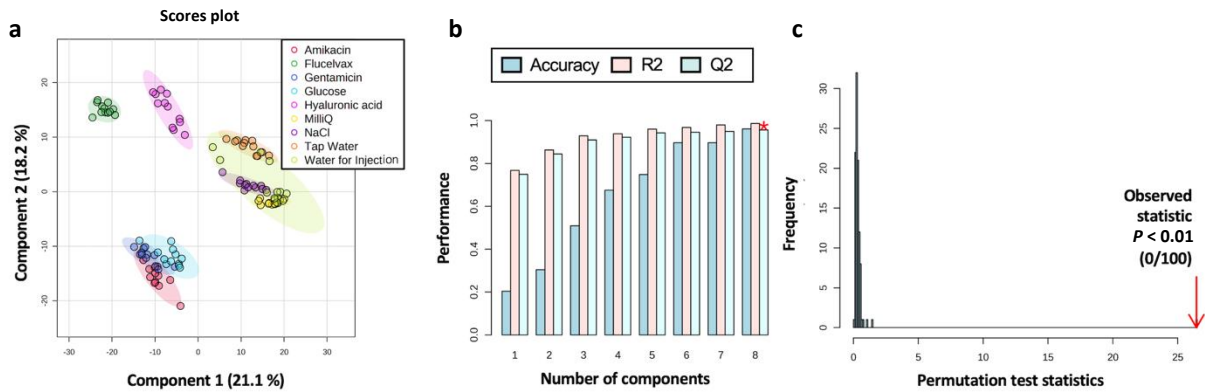

**d**

| Measure  | 1 component | 2 components | 3 components | 4 components | 5 components | 6 components | 7 components | 8 components |
|----------|-------------|--------------|--------------|--------------|--------------|--------------|--------------|--------------|
| Accuracy | 0.20381     | 0.304        | 0.50876      | 0.67505      | 0.7481       | 0.89686      | 0.89686      | 0.96143      |
| R2       | 0.7679      | 0.86241      | 0.92888      | 0.93894      | 0.96031      | 0.96804      | 0.97982      | 0.98656      |
| Q2       | 0.74868     | 0.84442      | 0.90948      | 0.92188      | 0.94219      | 0.94596      | 0.94957      | 0.95604      |

115

116

117

118

119

120

121

**Supplementary Figure 13.** VITEK MS partial least-squares discriminant analysis (PLS-DA) of authentic vaccine Flucelvac Tetra and all falsified vaccine constituents. (a) PLS-DA two-dimensional scores plot shows samples group clustering. (b) Cross validation shows a minimum of 8 components (mass spectral peaks) are required to differentiate the experimental groups for the best Q-squared (Q2) value (shown by \*). The Performance axis indicates the predictive ability of the model. (c) Permutation testing showed the model was significant with  $P < 0.01$ . (d) R-squared (R2), Q2 and accuracy values for the cross-validation in B

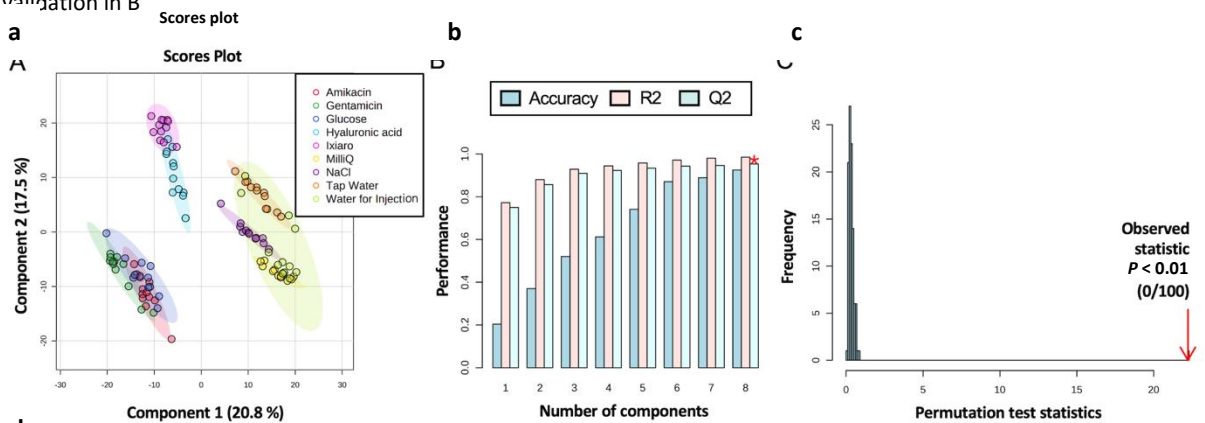

**d**

| Measure  | 1 component | 2 components | 3 components | 4 components | 5 components | 6 components | 7 components | 8 components |
|----------|-------------|--------------|--------------|--------------|--------------|--------------|--------------|--------------|
| Accuracy | 0.20365     | 0.37         | 0.52025      | 0.61214      | 0.74133      | 0.87088      | 0.88906      | 0.9255       |
| R2       | 0.77264     | 0.88014      | 0.9292       | 0.9443       | 0.95805      | 0.97216      | 0.98059      | 0.98564      |
| Q2       | 0.75012     | 0.85731      | 0.9092       | 0.92357      | 0.93425      | 0.94381      | 0.94676      | 0.95285      |

122

123

124

125

126

127

128

**Supplementary Figure 14.** VITEK MS partial least-squares discriminant analysis (PLS-DA) of authentic vaccine Ixiaro and all falsified vaccine constituents. (a) PLS-DA two-dimensional scores plot shows samples group clustering. (b) Cross validation shows a minimum of 8 components (mass spectral peaks) are required to differentiate the experimental groups for the best Q-squared (Q2) value (shown by \*). The Performance axis indicates the predictive ability of the model. (c) Permutation testing showed the model was significant with  $P < 0.01$ . (d) R-squared (R2), Q2 and accuracy values for the cross-validation in B.

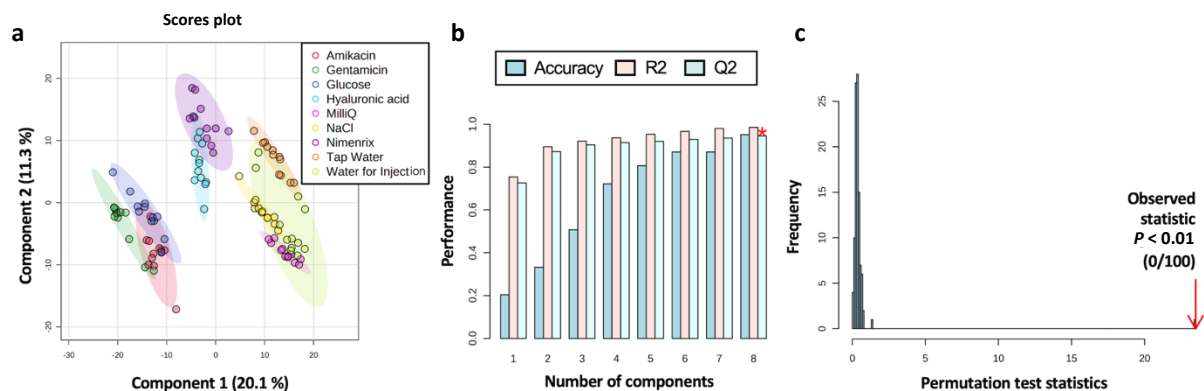

**d**

| Measure  | 1 component | 2 components | 3 components | 4 components | 5 components | 6 components | 7 components | 8 components |
|----------|-------------|--------------|--------------|--------------|--------------|--------------|--------------|--------------|
| Accuracy | 0.20369     | 0.3321       | 0.5074       | 0.72186      | 0.80684      | 0.87083      | 0.87083      | 0.95124      |
| R2       | 0.75418     | 0.89504      | 0.92108      | 0.93646      | 0.95299      | 0.96698      | 0.98058      | 0.98501      |
| Q2       | 0.72615     | 0.87293      | 0.90355      | 0.91466      | 0.92027      | 0.92862      | 0.93566      | 0.94542      |

129

130 **Supplementary Figure 15.** VITEK MS partial least-squares discriminant analysis (PLS-DA) of authentic vaccine Nimenrix and  
 131 all falsified vaccine constituents. (a) PLS-DA two-dimensional scores plot shows samples group clustering. (b) Cross validation  
 132 shows a minimum of 8 components (mass spectral peaks) are required to differentiate the experimental groups for the best  
 133 Q-squared (Q2) value (shown by \*). The Performance axis indicates the predictive ability of the model. (c) Permutation testing  
 134 showed the model was significant with  $P < 0.01$ . (d) R-squared (R2), Q2 and accuracy values for the cross-validation in B.

135

| Falsified constituents and genuine vaccine | Amikacin | Egerix B | Gentamicin | Glucose | Hyaluronic acid | MilliQ | NaCl | Tap water | Water for injection |
|--------------------------------------------|----------|----------|------------|---------|-----------------|--------|------|-----------|---------------------|
| Amikacin                                   | 12       | 0        | 0          | 0       | 0               | 0      | 0    | 0         | 0                   |
| Egerix B                                   | 0        | 12       | 0          | 0       | 0               | 0      | 0    | 0         | 0                   |
| Gentamicin                                 | 0        | 0        | 12         | 0       | 0               | 0      | 0    | 0         | 0                   |
| Glucose                                    | 0        | 0        | 0          | 12      | 0               | 0      | 0    | 0         | 0                   |
| Hyaluronic acid                            | 0        | 0        | 0          | 0       | 12              | 0      | 0    | 0         | 0                   |
| MilliQ                                     | 0        | 0        | 0          | 0       | 0               | 12     | 0    | 0         | 0                   |
| NaCl                                       | 0        | 0        | 0          | 0       | 0               | 0      | 12   | 0         | 0                   |
| Tap water                                  | 0        | 0        | 0          | 0       | 0               | 0      | 0    | 12        | 0                   |
| Water for injection                        | 0        | 0        | 0          | 0       | 0               | 0      | 0    | 0         | 12                  |

136

137 **Supplementary Table 4.** Egerix B confusion matrix using all-data (Sirius MS).

138

| Falsified constituents and genuine vaccine | Amikacin | Egerix B | Gentamicin | Glucose | Hyaluronic acid | MilliQ | NaCl | Tap water | Water for injection |
|--------------------------------------------|----------|----------|------------|---------|-----------------|--------|------|-----------|---------------------|
| Amikacin                                   | 10       | 0        | 0          | 0       | 0               | 0      | 0    | 0         | 0                   |
| Egerix B                                   | 0        | 10       | 0          | 0       | 0               | 0      | 0    | 0         | 0                   |
| Gentamicin                                 | 0        | 0        | 10         | 0       | 0               | 0      | 0    | 0         | 0                   |
| Glucose                                    | 0        | 0        | 0          | 9       | 0               | 1      | 0    | 0         | 0                   |
| Hyaluronic acid                            | 0        | 0        | 0          | 0       | 10              | 0      | 0    | 0         | 0                   |
| MilliQ                                     | 0        | 0        | 0          | 0       | 0               | 10     | 0    | 0         | 0                   |
| NaCl                                       | 0        | 0        | 0          | 0       | 0               | 0      | 10   | 0         | 0                   |
| Tap water                                  | 0        | 0        | 0          | 0       | 0               | 0      | 0    | 10        | 0                   |
| Water for injection                        | 0        | 0        | 0          | 0       | 0               | 0      | 2    | 0         | 8                   |

139

140 **Supplementary Table 5.** Egerix B confusion matrix using the training-set data (Sirius MS).

141

| Falsified constituents and genuine vaccine | Amikacin | Engerix B | Gentamicin | Glucose | Hyaluronic acid | MilliQ | NaCl | Tap water | Water for injection |
|--------------------------------------------|----------|-----------|------------|---------|-----------------|--------|------|-----------|---------------------|
| Amikacin                                   | 2        | 0         | 0          | 0       | 0               | 0      | 0    | 0         | 0                   |
| Engerix B                                  | 0        | 2         | 0          | 0       | 0               | 0      | 0    | 0         | 0                   |
| Gentamicin                                 | 0        | 0         | 2          | 0       | 0               | 0      | 0    | 0         | 0                   |
| Glucose                                    | 0        | 0         | 0          | 2       | 0               | 0      | 0    | 0         | 0                   |
| Hyaluronic acid                            | 0        | 0         | 0          | 0       | 2               | 0      | 0    | 0         | 0                   |
| MilliQ                                     | 0        | 0         | 0          | 0       | 0               | 2      | 0    | 0         | 0                   |
| NaCl                                       | 0        | 0         | 0          | 0       | 0               | 0      | 2    | 0         | 0                   |
| Tap water                                  | 0        | 0         | 0          | 0       | 0               | 0      | 0    | 2         | 0                   |
| Water for injection                        | 0        | 0         | 0          | 0       | 0               | 2      | 0    | 0         | 0                   |

142

143 **Supplementary Table 6.** Engerix B confusion matrix using the test-set data (Sirius MS).

144

| Falsified constituents and genuine vaccine | Amikacin | Flucelvax | Gentamicin | Glucose | Hyaluronic acid | MilliQ | NaCl | Tap water | Water for injection |
|--------------------------------------------|----------|-----------|------------|---------|-----------------|--------|------|-----------|---------------------|
| Amikacin                                   | 12       | 0         | 0          | 0       | 0               | 0      | 0    | 0         | 0                   |
| Flucelvax                                  | 0        | 12        | 0          | 0       | 0               | 0      | 0    | 0         | 0                   |
| Gentamicin                                 | 0        | 0         | 12         | 0       | 0               | 0      | 0    | 0         | 0                   |
| Glucose                                    | 1        | 0         | 0          | 11      | 0               | 0      | 0    | 0         | 0                   |
| Hyaluronic acid                            | 0        | 0         | 0          | 0       | 12              | 0      | 0    | 0         | 0                   |
| MilliQ                                     | 0        | 0         | 0          | 0       | 0               | 0      | 0    | 0         | 12                  |
| NaCl                                       | 0        | 0         | 0          | 0       | 0               | 0      | 12   | 0         | 0                   |
| Tap water                                  | 0        | 0         | 0          | 0       | 0               | 0      | 0    | 12        | 0                   |
| Water for injection                        | 0        | 0         | 0          | 0       | 0               | 0      | 0    | 0         | 12                  |

145

146 **Supplementary Table 7.** Flucelvax confusion matrix using all-data (Sirius MS).

147

| Falsified constituents and genuine vaccine | Amikacin | Flucelvax | Gentamicin | Glucose | Hyaluronic acid | MilliQ | NaCl | Tap water | Water for injection |
|--------------------------------------------|----------|-----------|------------|---------|-----------------|--------|------|-----------|---------------------|
| Amikacin                                   | 10       | 0         | 0          | 0       | 0               | 0      | 0    | 0         | 0                   |
| Flucelvax                                  | 0        | 10        | 0          | 0       | 0               | 0      | 0    | 0         | 0                   |
| Gentamicin                                 | 0        | 0         | 10         | 0       | 0               | 0      | 0    | 0         | 0                   |
| Glucose                                    | 2        | 0         | 0          | 7       | 0               | 1      | 0    | 0         | 0                   |
| Hyaluronic acid                            | 0        | 0         | 0          | 0       | 10              | 0      | 0    | 0         | 0                   |
| MilliQ                                     | 0        | 0         | 0          | 0       | 0               | 10     | 0    | 0         | 0                   |
| NaCl                                       | 0        | 0         | 0          | 0       | 0               | 0      | 10   | 0         | 0                   |
| Tap water                                  | 0        | 0         | 0          | 0       | 0               | 0      | 0    | 10        | 0                   |
| Water for injection                        | 0        | 0         | 0          | 0       | 0               | 7      | 0    | 0         | 3                   |

148

149 **Supplementary Table 8.** Flucelvax confusion matrix using the training-set data (Sirius MS).

150

| Falsified constituents and genuine vaccine | Amikacin | Flucelvax | Gentamicin | Glucose | Hyaluronic acid | MilliQ | NaCl | Tap water | Water for injection |
|--------------------------------------------|----------|-----------|------------|---------|-----------------|--------|------|-----------|---------------------|
| Amikacin                                   | 2        | 0         | 0          | 0       | 0               | 0      | 0    | 0         | 0                   |
| Flucelvax                                  | 0        | 2         | 0          | 0       | 0               | 0      | 0    | 0         | 0                   |
| Gentamicin                                 | 0        | 0         | 2          | 0       | 0               | 0      | 0    | 0         | 0                   |
| Glucose                                    | 0        | 0         | 0          | 2       | 0               | 0      | 0    | 0         | 0                   |
| Hyaluronic acid                            | 0        | 0         | 0          | 0       | 2               | 0      | 0    | 0         | 0                   |
| MilliQ                                     | 0        | 0         | 0          | 0       | 0               | 2      | 0    | 0         | 0                   |
| NaCl                                       | 0        | 0         | 0          | 0       | 0               | 0      | 2    | 0         | 0                   |
| Tap water                                  | 0        | 0         | 0          | 0       | 0               | 0      | 0    | 2         | 0                   |
| Water for injection                        | 0        | 0         | 0          | 0       | 0               | 2      | 0    | 0         | 0                   |

151

152 **Supplementary Table 9.** Flucelvax confusion matrix using the test-set data (Sirius MS).

153

| Falsified constituents and genuine vaccine | Amikacin | Gentamicin | Glucose | Hyaluronic acid | MilliQ | NaCl | Nimenrix | Tap water | Water for injection |
|--------------------------------------------|----------|------------|---------|-----------------|--------|------|----------|-----------|---------------------|
| Amikacin                                   | 12       | 0          | 0       | 0               | 0      | 0    | 0        | 0         | 0                   |
| Gentamicin                                 | 0        | 12         | 0       | 0               | 0      | 0    | 0        | 0         | 0                   |
| Glucose                                    | 0        | 0          | 12      | 0               | 0      | 0    | 0        | 0         | 0                   |
| Hyaluronic acid                            | 0        | 0          | 0       | 12              | 0      | 0    | 0        | 0         | 0                   |
| MilliQ                                     | 0        | 0          | 0       | 0               | 0      | 0    | 0        | 0         | 12                  |
| NaCl                                       | 0        | 0          | 0       | 0               | 0      | 12   | 0        | 0         | 0                   |
| Nimenrix                                   | 0        | 0          | 0       | 0               | 0      | 0    | 12       | 0         | 0                   |
| Tap water                                  | 0        | 0          | 0       | 0               | 0      | 0    | 0        | 12        | 0                   |
| Water for injection                        | 0        | 0          | 0       | 0               | 0      | 0    | 0        | 0         | 12                  |

154

155 **Supplementary Table 10.** Nimenrix confusion matrix using the all-data (Sirius MS).

156

| Falsified constituents and genuine vaccine | Amikacin | Gentamicin | Glucose | Hyaluronic acid | MilliQ | NaCl | Nimenrix | Tap water | Water for injection |
|--------------------------------------------|----------|------------|---------|-----------------|--------|------|----------|-----------|---------------------|
| Amikacin                                   | 10       | 0          | 0       | 0               | 0      | 0    | 0        | 0         | 0                   |
| Gentamicin                                 | 0        | 10         | 0       | 0               | 0      | 0    | 0        | 0         | 0                   |
| Glucose                                    | 0        | 0          | 10      | 0               | 0      | 0    | 0        | 0         | 0                   |
| Hyaluronic acid                            | 0        | 0          | 0       | 10              | 0      | 0    | 0        | 0         | 0                   |
| MilliQ                                     | 0        | 0          | 0       | 0               | 9      | 0    | 0        | 0         | 1                   |
| NaCl                                       | 0        | 0          | 0       | 0               | 0      | 10   | 0        | 0         | 0                   |
| Nimenrix                                   | 0        | 0          | 0       | 0               | 0      | 0    | 10       | 0         | 0                   |
| Tap water                                  | 0        | 0          | 0       | 0               | 0      | 0    | 0        | 10        | 0                   |
| Water for injection                        | 0        | 0          | 0       | 0               | 5      | 0    | 0        | 0         | 5                   |

157

158 **Supplementary Table 11.** Nimenrix confusion matrix using the training-set data (Sirius MS).

159

| Falsified constituents and genuine vaccine | Amikacin | Gentamicin | Glucose | Hyaluronic acid | MilliQ | NaCl | Nimenrix | Tap water | Water for injection |
|--------------------------------------------|----------|------------|---------|-----------------|--------|------|----------|-----------|---------------------|
| Amikacin                                   | 2        | 0          | 0       | 0               | 0      | 0    | 0        | 0         | 0                   |
| Gentamicin                                 | 0        | 2          | 0       | 0               | 0      | 0    | 0        | 0         | 0                   |
| Glucose                                    | 0        | 0          | 2       | 0               | 0      | 0    | 0        | 0         | 0                   |
| Hyaluronic acid                            | 0        | 0          | 0       | 2               | 0      | 0    | 0        | 0         | 0                   |
| MilliQ                                     | 0        | 0          | 0       | 0               | 2      | 0    | 0        | 0         | 0                   |
| NaCl                                       | 0        | 0          | 0       | 0               | 0      | 2    | 0        | 0         | 0                   |
| Nimenrix                                   | 0        | 0          | 0       | 0               | 0      | 0    | 2        | 0         | 0                   |
| Tap water                                  | 0        | 0          | 0       | 0               | 0      | 0    | 0        | 2         | 0                   |
| Water for injection                        | 0        | 0          | 0       | 0               | 2      | 0    | 0        | 0         | 0                   |

160

161 **Supplementary Table 12.** Nimenrix confusion matrix using the test-set data (Sirius MS).

| Falsified constituents and genuine vaccine | Amikacin | Gentamicin | Glucose | Hyaluronic acid | Ixiaro | MilliQ | NaCl | Tap water | Water for injection |
|--------------------------------------------|----------|------------|---------|-----------------|--------|--------|------|-----------|---------------------|
| Amikacin                                   | 12       | 0          | 0       | 0               | 0      | 0      | 0    | 0         | 0                   |
| Gentamicin                                 | 0        | 12         | 0       | 0               | 0      | 0      | 0    | 0         | 0                   |
| Glucose                                    | 0        | 0          | 12      | 0               | 0      | 0      | 0    | 0         | 0                   |
| Hyaluronic acid                            | 0        | 0          | 0       | 12              | 0      | 0      | 0    | 0         | 0                   |
| Ixiaro                                     | 0        | 0          | 0       | 0               | 12     | 0      | 0    | 0         | 0                   |
| MilliQ                                     | 0        | 0          | 0       | 0               | 0      | 0      | 0    | 0         | 12                  |
| NaCl                                       | 0        | 0          | 0       | 0               | 0      | 0      | 12   | 0         | 0                   |
| Tap water                                  | 0        | 0          | 0       | 0               | 0      | 0      | 0    | 12        | 0                   |
| Water for injection                        | 0        | 0          | 0       | 0               | 0      | 0      | 0    | 0         | 12                  |

162

163 **Supplementary Table 13.** Ixiaro confusion matrix using the test-set data (Sirius MS).

164

| Falsified constituents and genuine vaccine | Amikacin | Gentamicin | Glucose | Hyaluronic acid | Ixiaro | MilliQ | NaCl | Tap water | Water for injection |
|--------------------------------------------|----------|------------|---------|-----------------|--------|--------|------|-----------|---------------------|
| Amikacin                                   | 10       | 0          | 0       | 0               | 0      | 0      | 0    | 0         | 0                   |
| Gentamicin                                 | 0        | 10         | 0       | 0               | 0      | 0      | 0    | 0         | 0                   |
| Glucose                                    | 0        | 0          | 10      | 0               | 0      | 0      | 0    | 0         | 0                   |
| Hyaluronic acid                            | 0        | 0          | 0       | 10              | 0      | 0      | 0    | 0         | 0                   |
| Ixiaro                                     | 0        | 0          | 0       | 0               | 10     | 0      | 0    | 0         | 0                   |
| MilliQ                                     | 0        | 0          | 0       | 0               | 0      | 10     | 0    | 0         | 0                   |
| NaCl                                       | 0        | 0          | 0       | 0               | 0      | 0      | 10   | 0         | 0                   |
| Tap water                                  | 0        | 0          | 0       | 0               | 0      | 0      | 0    | 10        | 0                   |
| Water for injection                        | 0        | 0          | 0       | 0               | 0      | 10     | 0    | 0         | 0                   |

165

166 **Supplementary Table 14.** Ixiaro confusion matrix using the training-set data (Sirius MS).

167

| Falsified constituents and genuine vaccine | Amikacin | Gentamicin | Glucose | Hyaluronic acid | Ixiaro | MilliQ | NaCl | Tap water | Water for injection |
|--------------------------------------------|----------|------------|---------|-----------------|--------|--------|------|-----------|---------------------|
| Amikacin                                   | 2        | 0          | 0       | 0               | 0      | 0      | 0    | 0         | 0                   |
| Gentamicin                                 | 0        | 2          | 0       | 0               | 0      | 0      | 0    | 0         | 0                   |
| Glucose                                    | 0        | 0          | 2       | 0               | 0      | 0      | 0    | 0         | 0                   |
| Hyaluronic acid                            | 0        | 0          | 0       | 2               | 0      | 0      | 0    | 0         | 0                   |
| Ixiaro                                     | 0        | 0          | 0       | 0               | 2      | 0      | 0    | 0         | 0                   |
| MilliQ                                     | 0        | 0          | 0       | 0               | 0      | 2      | 0    | 0         | 0                   |
| NaCl                                       | 0        | 0          | 0       | 0               | 0      | 0      | 2    | 0         | 0                   |
| Tap water                                  | 0        | 0          | 0       | 0               | 0      | 0      | 0    | 2         | 0                   |
| Water for injection                        | 0        | 0          | 0       | 0               | 0      | 2      | 0    | 0         | 0                   |

168

169 **Supplementary Table 15.** Ixiaro confusion matrix using the test-set data (Sirius MS).

170

| Falsified constituents and genuine vaccine | Amikacin | Engerix B | Gentamicin | Glucose | Hyaluronic acid | MilliQ | NaCl | Tap water | Water for injection |
|--------------------------------------------|----------|-----------|------------|---------|-----------------|--------|------|-----------|---------------------|
| Amikacin                                   | 12       | 0         | 0          | 0       | 0               | 0      | 0    | 0         | 0                   |
| Engerix                                    | 0        | 12        | 0          | 0       | 0               | 0      | 0    | 0         | 0                   |
| Gentamicin                                 | 0        | 0         | 12         | 0       | 0               | 0      | 0    | 0         | 0                   |
| Glucose                                    | 0        | 0         | 0          | 12      | 0               | 0      | 0    | 0         | 0                   |
| Hyaluronic Acid                            | 0        | 0         | 0          | 0       | 12              | 0      | 0    | 0         | 0                   |
| MilliQ                                     | 0        | 0         | 0          | 0       | 0               | 12     | 0    | 0         | 0                   |
| NaCl                                       | 0        | 5         | 0          | 0       | 0               | 0      | 7    | 0         | 0                   |
| Tap water                                  | 0        | 0         | 0          | 0       | 0               | 0      | 0    | 12        | 0                   |
| Water for injection                        | 0        | 0         | 0          | 0       | 0               | 8      | 0    | 1         | 3                   |

171

172 **Supplementary Table 16.** Engerix B confusion matrix using the all-data (VITEK MS).



173

| Falsified constituents and genuine vaccine | Amikacin | Engerix B | Gentamicin | Glucose | Hyaluronic acid | MilliQ | NaCl | Tap water | Water for injection |
|--------------------------------------------|----------|-----------|------------|---------|-----------------|--------|------|-----------|---------------------|
| Amikacin                                   | 10       | 0         | 0          | 0       | 0               | 0      | 0    | 0         | 0                   |
| Engerix                                    | 0        | 10        | 0          | 0       | 0               | 0      | 0    | 0         | 0                   |
| Gentamicin                                 | 0        | 0         | 10         | 0       | 0               | 0      | 0    | 0         | 0                   |
| Glucose                                    | 0        | 0         | 0          | 10      | 0               | 0      | 0    | 0         | 0                   |
| Hyaluronic Acid                            | 0        | 0         | 0          | 0       | 10              | 0      | 0    | 0         | 0                   |
| MilliQ                                     | 0        | 0         | 0          | 0       | 0               | 0      | 0    | 0         | 10                  |
| NaCl                                       | 0        | 4         | 0          | 0       | 0               | 0      | 6    | 0         | 0                   |
| Tap water                                  | 0        | 0         | 0          | 0       | 0               | 0      | 0    | 10        | 0                   |
| Water for injection                        | 0        | 0         | 0          | 0       | 0               | 0      | 0    | 0         | 10                  |

174

175 **Supplementary Table 17.** Engerix B confusion matrix using the training-set data (VITEK MS).

176

| Falsified constituents and genuine vaccine | Amikacin | Engerix B | Gentamicin | Glucose | Hyaluronic acid | MilliQ | NaCl | Tap water | Water for injection |
|--------------------------------------------|----------|-----------|------------|---------|-----------------|--------|------|-----------|---------------------|
| Amikacin                                   | 2        | 0         | 0          | 0       | 0               | 0      | 0    | 0         | 0                   |
| Engerix                                    | 0        | 2         | 0          | 0       | 0               | 0      | 0    | 0         | 0                   |
| Gentamicin                                 | 0        | 0         | 2          | 0       | 0               | 0      | 0    | 0         | 0                   |
| Glucose                                    | 0        | 0         | 0          | 2       | 0               | 0      | 0    | 0         | 0                   |
| Hyaluronic Acid                            | 0        | 0         | 0          | 0       | 2               | 0      | 0    | 0         | 0                   |
| MilliQ                                     | 0        | 0         | 0          | 0       | 0               | 0      | 0    | 0         | 2                   |
| NaCl                                       | 0        | 1         | 0          | 0       | 0               | 0      | 1    | 0         | 0                   |
| Tap water                                  | 0        | 0         | 0          | 0       | 0               | 0      | 0    | 2         | 0                   |
| Water for injection                        | 0        | 0         | 0          | 0       | 0               | 0      | 0    | 2         | 0                   |

177

178 **Supplementary Table 18.** Engerix B confusion matrix using the test-set data (VITEK MS).

179

| Falsified constituents and genuine vaccine | Amikacin | Flucelvax | Gentamicin | Glucose | Hyaluronic acid | MilliQ | NaCl | Tap water | Water for injection |
|--------------------------------------------|----------|-----------|------------|---------|-----------------|--------|------|-----------|---------------------|
| Amikacin                                   | 12       | 0         | 0          | 0       | 0               | 0      | 0    | 0         | 0                   |
| Flucelvax                                  | 0        | 12        | 0          | 0       | 0               | 0      | 0    | 0         | 0                   |
| Gentamicin                                 | 0        | 0         | 12         | 0       | 0               | 0      | 0    | 0         | 0                   |
| Glucose                                    | 0        | 0         | 0          | 12      | 0               | 0      | 0    | 0         | 0                   |
| Hyaluronic Acid                            | 0        | 0         | 0          | 0       | 12              | 0      | 0    | 0         | 0                   |
| MilliQ                                     | 0        | 0         | 0          | 0       | 0               | 12     | 0    | 0         | 0                   |
| NaCl                                       | 0        | 0         | 0          | 0       | 0               | 0      | 12   | 0         | 0                   |
| Tap water                                  | 0        | 0         | 0          | 0       | 0               | 0      | 0    | 12        | 0                   |
| Water for injection                        | 0        | 1         | 0          | 0       | 0               | 8      | 0    | 0         | 3                   |

180

181 **Supplementary Table 19.** Flucelvax confusion matrix using the all-data (VITEK MS).

182

| Falsified constituents and genuine vaccine | Amikacin | Flucelvax | Gentamicin | Glucose | Hyaluronic acid | MilliQ | NaCl | Tap water | Water for injection |
|--------------------------------------------|----------|-----------|------------|---------|-----------------|--------|------|-----------|---------------------|
| Amikacin                                   | 10       | 0         | 0          | 0       | 0               | 0      | 0    | 0         | 0                   |
| Flucelvax                                  | 0        | 10        | 0          | 0       | 0               | 0      | 0    | 0         | 0                   |
| Gentamicin                                 | 0        | 0         | 10         | 0       | 0               | 0      | 0    | 0         | 0                   |
| Glucose                                    | 0        | 0         | 0          | 10      | 0               | 0      | 0    | 0         | 0                   |
| Hyaluronic Acid                            | 0        | 0         | 0          | 0       | 10              | 0      | 0    | 0         | 0                   |
| MilliQ                                     | 0        | 0         | 0          | 0       | 0               | 0      | 0    | 0         | 10                  |
| NaCl                                       | 0        | 0         | 0          | 0       | 0               | 0      | 10   | 0         | 0                   |
| Tap water                                  | 0        | 0         | 0          | 0       | 0               | 0      | 0    | 10        | 0                   |
| Water for injection                        | 0        | 0         | 0          | 0       | 0               | 0      | 0    | 0         | 10                  |

183

184

**Supplementary Table 20.** Flucelvax confusion matrix using the training-data (VITEK MS).

185

| Falsified constituents and genuine vaccine | Amikacin | Flucelvax | Gentamicin | Glucose | Hyaluronic acid | MilliQ | NaCl | Tap water | Water for injection |
|--------------------------------------------|----------|-----------|------------|---------|-----------------|--------|------|-----------|---------------------|
| Amikacin                                   | 2        | 0         | 0          | 0       | 0               | 0      | 0    | 0         | 0                   |
| Flucelvax                                  | 0        | 2         | 0          | 0       | 0               | 0      | 0    | 0         | 0                   |
| Gentamicin                                 | 0        | 0         | 2          | 0       | 0               | 0      | 0    | 0         | 0                   |
| Glucose                                    | 0        | 0         | 0          | 2       | 0               | 0      | 0    | 0         | 0                   |
| Hyaluronic Acid                            | 0        | 0         | 0          | 0       | 2               | 0      | 0    | 0         | 0                   |
| MilliQ                                     | 0        | 0         | 0          | 0       | 0               | 0      | 0    | 0         | 2                   |
| NaCl                                       | 0        | 0         | 0          | 0       | 0               | 0      | 2    | 0         | 0                   |
| Tap water                                  | 0        | 0         | 0          | 0       | 0               | 0      | 0    | 2         | 0                   |
| Water for injection                        | 0        | 1         | 0          | 0       | 0               | 0      | 0    | 0         | 1                   |

186

187

**Supplementary Table 21.** Flucelvax confusion matrix using the test-set data (VITEK MS).

188

| Falsified constituents and genuine vaccine | Amikacin | Gentamicin | Glucose | Hyaluronic acid | MilliQ | NaCl | Nimenrix | Tap water | Water for injection |
|--------------------------------------------|----------|------------|---------|-----------------|--------|------|----------|-----------|---------------------|
| Amikacin                                   | 12       | 0          | 0       | 0               | 0      | 0    | 0        | 0         | 0                   |
| Gentamicin                                 | 0        | 12         | 0       | 0               | 0      | 0    | 0        | 0         | 0                   |
| Glucose                                    | 0        | 0          | 12      | 0               | 0      | 0    | 0        | 0         | 0                   |
| Hyaluronic Acid                            | 0        | 0          | 0       | 12              | 0      | 0    | 0        | 0         | 0                   |
| MilliQ                                     | 0        | 0          | 0       | 0               | 12     | 0    | 0        | 0         | 0                   |
| NaCl                                       | 0        | 0          | 0       | 0               | 0      | 12   | 0        | 0         | 0                   |
| Nimenrix                                   | 0        | 0          | 0       | 0               | 0      | 0    | 12       | 0         | 0                   |
| Tap water                                  | 0        | 0          | 0       | 0               | 0      | 0    | 0        | 12        | 0                   |
| Water for injection                        | 0        | 0          | 0       | 0               | 8      | 0    | 0        | 1         | 3                   |

189

190

**Supplementary Table 22.** Nimenrix confusion matrix using the full-data (VITEK MS).

191

| Falsified constituents and genuine vaccine | Amikacin | Gentamicin | Glucose | Hyaluronic acid | MilliQ | NaCl | Nimenrix | Tap water | Water for injection |
|--------------------------------------------|----------|------------|---------|-----------------|--------|------|----------|-----------|---------------------|
| Amikacin                                   | 10       | 0          | 0       | 0               | 0      | 0    | 0        | 0         | 0                   |
| Gentamicin                                 | 0        | 10         | 0       | 0               | 0      | 0    | 0        | 0         | 0                   |
| Glucose                                    | 0        | 0          | 10      | 0               | 0      | 0    | 0        | 0         | 0                   |
| Hyaluronic Acid                            | 0        | 0          | 0       | 10              | 0      | 0    | 0        | 0         | 0                   |
| MilliQ                                     | 0        | 0          | 0       | 0               | 0      | 0    | 0        | 0         | 10                  |
| NaCl                                       | 0        | 0          | 0       | 0               | 0      | 10   | 0        | 0         | 0                   |
| Nimenrix                                   | 0        | 0          | 0       | 0               | 0      | 0    | 10       | 0         | 0                   |
| Tap water                                  | 0        | 0          | 0       | 0               | 0      | 0    | 0        | 10        | 0                   |
| Water for injection                        | 0        | 0          | 0       | 0               | 0      | 0    | 0        | 0         | 10                  |

192

193 **Supplementary Table 23.** Nimenrix confusion matrix using the training-data (VITEK MS).

194

| Falsified constituents and genuine vaccine | Amikacin | Gentamicin | Glucose | Hyaluronic acid | MilliQ | NaCl | Nimenrix | Tap water | Water for injection |
|--------------------------------------------|----------|------------|---------|-----------------|--------|------|----------|-----------|---------------------|
| Amikacin                                   | 2        | 0          | 0       | 0               | 0      | 0    | 0        | 0         | 0                   |
| Gentamicin                                 | 0        | 2          | 0       | 0               | 0      | 0    | 0        | 0         | 0                   |
| Glucose                                    | 0        | 0          | 2       | 0               | 0      | 0    | 0        | 0         | 0                   |
| Hyaluronic Acid                            | 0        | 0          | 0       | 2               | 0      | 0    | 0        | 0         | 0                   |
| MilliQ                                     | 0        | 0          | 0       | 0               | 0      | 0    | 0        | 0         | 2                   |
| NaCl                                       | 0        | 0          | 0       | 0               | 0      | 2    | 0        | 0         | 0                   |
| Nimenrix                                   | 0        | 0          | 0       | 0               | 0      | 0    | 2        | 0         | 0                   |
| Tap water                                  | 0        | 0          | 0       | 0               | 0      | 0    | 0        | 2         | 0                   |
| Water for injection                        | 0        | 0          | 0       | 0               | 0      | 0    | 0        | 1         | 1                   |

195

196 **Supplementary Table 24.** Nimenrix confusion matrix using the test-set data (VITEK MS).

197

| Falsified constituents and genuine vaccine | Amikacin | Gentamicin | Glucose | Hyaluronic acid | Ixiaro | MilliQ | NaCl | Tap water | Water for injection |
|--------------------------------------------|----------|------------|---------|-----------------|--------|--------|------|-----------|---------------------|
| Amikacin                                   | 11       | 0          | 0       | 0               | 0      | 0      | 1    | 0         | 0                   |
| Gentamicin                                 | 0        | 12         | 0       | 0               | 0      | 0      | 0    | 0         | 0                   |
| Glucose                                    | 0        | 0          | 12      | 0               | 0      | 0      | 0    | 0         | 0                   |
| Hyaluronic Acid                            | 0        | 0          | 0       | 12              | 0      | 0      | 0    | 0         | 0                   |
| Ixiaro                                     | 0        | 0          | 0       | 0               | 12     | 0      | 0    | 0         | 0                   |
| MilliQ                                     | 0        | 0          | 0       | 0               | 0      | 12     | 0    | 0         | 0                   |
| NaCl                                       | 0        | 0          | 0       | 0               | 0      | 0      | 12   | 0         | 0                   |
| Tap water                                  | 0        | 0          | 0       | 0               | 0      | 0      | 0    | 12        | 0                   |
| Water for injection                        | 0        | 0          | 0       | 0               | 0      | 8      | 0    | 0         | 4                   |

198

199 **Supplementary Table 25.** Ixiaro confusion matrix using the all-data (VITEK MS).

200

| Falsified constituents and genuine vaccine | Amikacin | Gentamicin | Glucose | Hyaluronic acid | Ixiaro | MilliQ | NaCl | Tap water | Water for injection |
|--------------------------------------------|----------|------------|---------|-----------------|--------|--------|------|-----------|---------------------|
| Amikacin                                   | 7        | 0          | 1       | 0               | 0      | 0      | 2    | 0         | 0                   |
| Gentamicin                                 | 0        | 10         | 0       | 0               | 0      | 0      | 0    | 0         | 0                   |
| Glucose                                    | 0        | 0          | 10      | 0               | 0      | 0      | 0    | 0         | 0                   |
| Hyaluronic Acid                            | 0        | 0          | 0       | 10              | 0      | 0      | 0    | 0         | 0                   |
| Ixiaro                                     | 0        | 0          | 0       | 0               | 10     | 0      | 0    | 0         | 0                   |
| MilliQ                                     | 0        | 0          | 0       | 0               | 0      | 0      | 0    | 0         | 10                  |
| NaCl                                       | 0        | 0          | 0       | 0               | 0      | 0      | 10   | 0         | 0                   |
| Tap water                                  | 0        | 0          | 0       | 0               | 0      | 0      | 0    | 10        | 0                   |
| Water for injection                        | 0        | 0          | 0       | 0               | 0      | 0      | 0    | 0         | 10                  |

201

202

**Supplementary Table 26.** Ixiaro confusion matrix using the training-set data (VITEK MS).

203

| Falsified constituents and genuine vaccine | Amikacin | Gentamicin | Glucose | Hyaluronic acid | Ixiaro | MilliQ | NaCl | Tap water | Water for injection |
|--------------------------------------------|----------|------------|---------|-----------------|--------|--------|------|-----------|---------------------|
| Amikacin                                   | 2        | 0          | 0       | 0               | 0      | 0      | 0    | 0         | 0                   |
| Gentamicin                                 | 0        | 2          | 0       | 0               | 0      | 0      | 0    | 0         | 0                   |
| Glucose                                    | 0        | 0          | 2       | 0               | 0      | 0      | 0    | 0         | 0                   |
| Hyaluronic Acid                            | 0        | 0          | 0       | 2               | 0      | 0      | 0    | 0         | 0                   |
| Ixiaro                                     | 0        | 0          | 0       | 0               | 2      | 0      | 0    | 0         | 0                   |
| MilliQ                                     | 0        | 0          | 0       | 0               | 0      | 0      | 0    | 0         | 2                   |
| NaCl                                       | 0        | 0          | 0       | 0               | 0      | 0      | 2    | 0         | 0                   |
| Tap water                                  | 0        | 0          | 0       | 0               | 0      | 0      | 0    | 2         | 0                   |
| Water for injection                        | 0        | 0          | 0       | 0               | 0      | 0      | 0    | 1         | 1                   |

204

205

**Supplementary Table 27.** Ixiaro confusion matrix using the test-set data (VITEK MS).

206

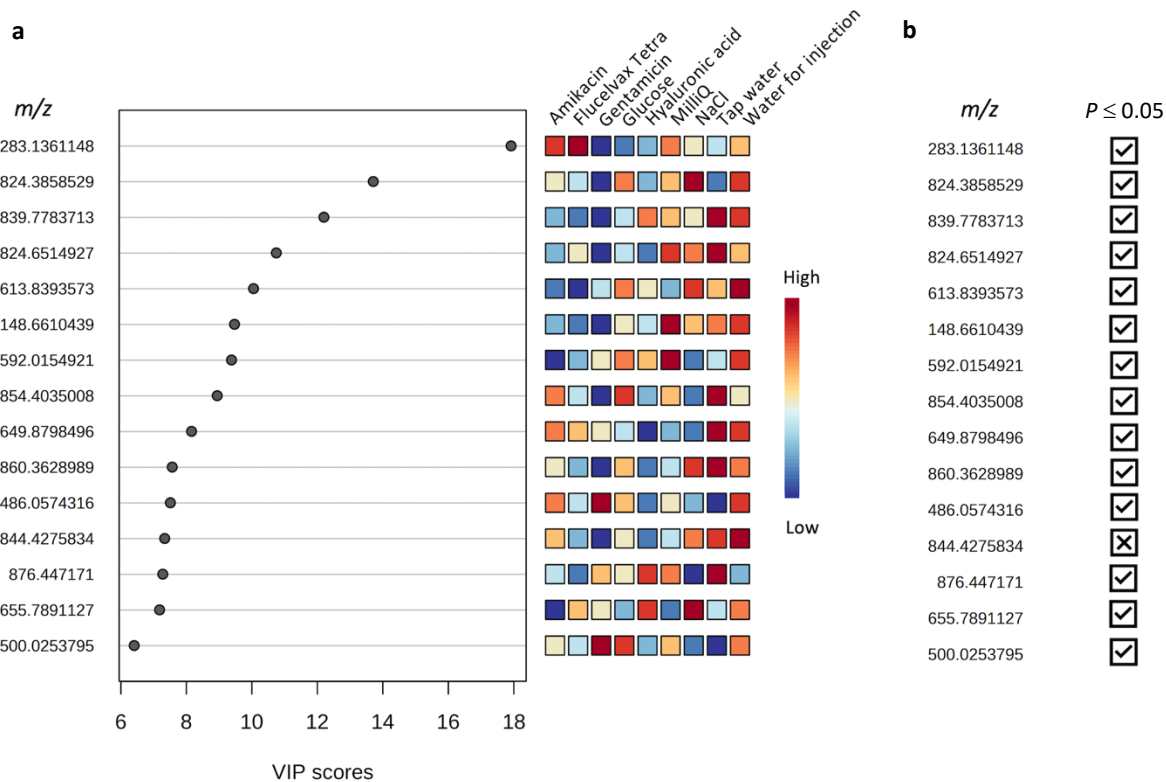

207

208 **Supplementary Figure 16.** Biotyper Sirius analyses of compound feature significance. (a) Variable importance in the  
 209 projection (VIP) of the peaks at 0–900 *m/z* for Flucelvac Tetra vaccine compared to the 8 falsified constituents. The top 15  
 210 *m/z* values are plotted based on their VIP score. The heatmaps to the right of the plot represents the relative intensities of  
 211 the *m/z* values for each sample group averaged over the group. (b) The two-way analysis of variance with Dunnett multiple  
 212 comparison test results for the top 15 *m/z* values from the VIP analysis. *m/z* values with at least one statistically significant  
 213 comparison ( $P \leq 0.05$ ) for a falsified constituent compared to Flucelvac Tetra are marked with a check. *m/z* values without a  
 214 statistically significant comparison ( $P > 0.05$ ) are marked with an 'X' and are likely contributors to the VIP plot as important  
 215 features for distinguishing between falsified constituents as opposed to distinguishing the genuine vaccine from the falsified  
 216 constituents.

217

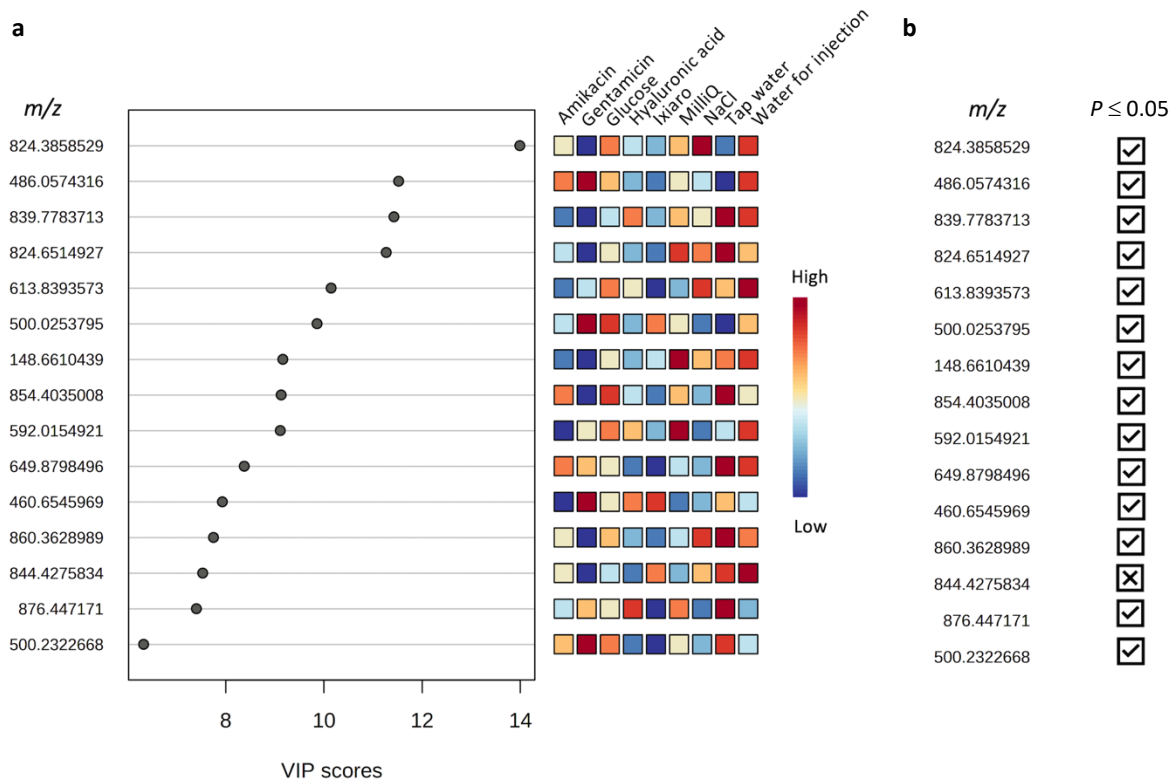

218

219 **Supplementary Figure 17.** Biotyper Sirius analyses of compound feature significance. (a) Variable importance in the  
 220 projection (VIP) of the peaks at 0–900  $m/z$  for Ixiaro vaccine compared to the 8 falsified constituents. The top 15  $m/z$  values  
 221 are plotted based on their VIP score. The heatmaps to the right of the plot represents the relative intensities of the  $m/z$   
 222 values for each sample group averaged over the group. (b) The two-way analysis of variance with Dunnett multiple  
 223 comparison test results for the top 15  $m/z$  values from the VIP analysis.  $m/z$  values with at least one statistically significant  
 224 comparison ( $P \leq 0.05$ ) for a falsified constituent compared to Ixiaro are marked with a check.  $m/z$  values without a statistically  
 225 significant comparison ( $P > 0.05$ ) are marked with an 'X' and are likely contributors to the VIP plot as important features for  
 226 distinguishing between falsified constituents as opposed to distinguishing the genuine vaccine from the falsified constituents.

227

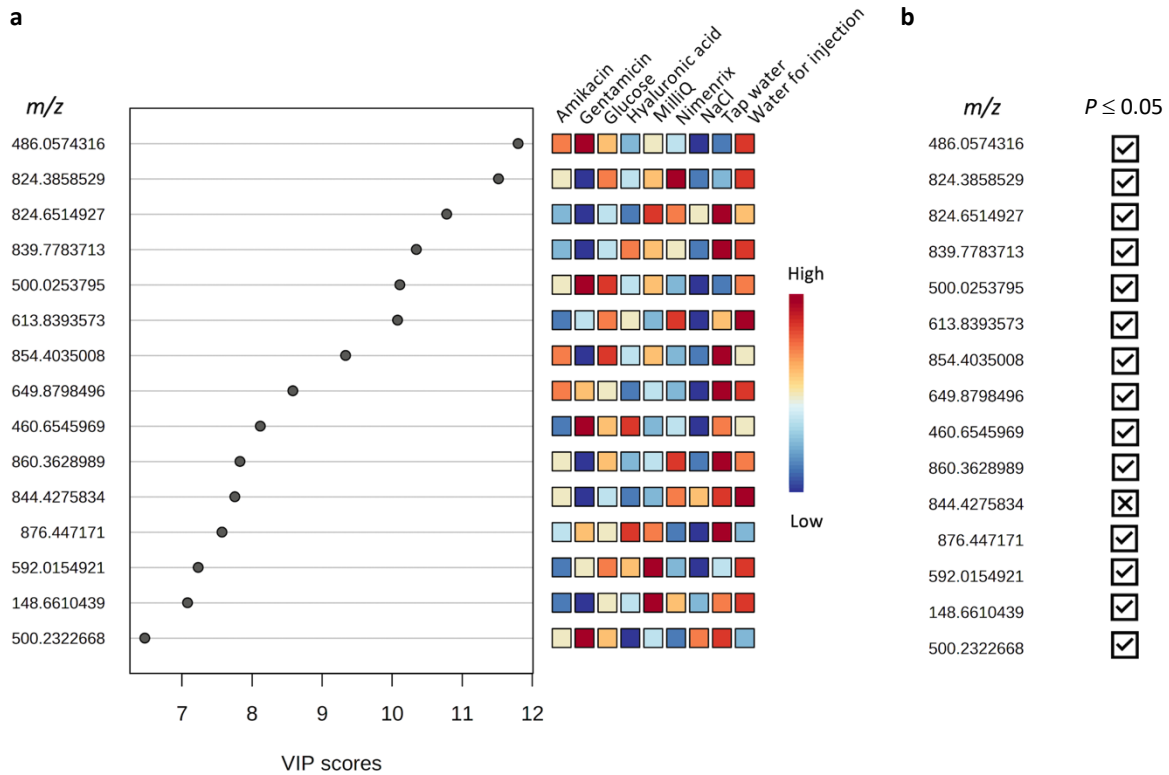

228

229 **Supplementary Figure 18.** Biotyper Sirius analyses of compound feature significance. (a) Variable importance in the  
 230 projection (VIP) of the peaks at 0–900  $m/z$  for Nimenrix vaccine compared to the 8 falsified constituents. The top 15  $m/z$   
 231 values are plotted based on their VIP score. The heatmaps to the right of the plot represents the relative intensities of the  
 232  $m/z$  values for each sample group averaged over the group. (b) The two-way analysis of variance with Dunnett multiple  
 233 comparison test results for the top 15  $m/z$  values from the VIP analysis.  $m/z$  values with at least one statistically significant  
 234 comparison ( $P \leq 0.05$ ) for a falsified constituent compared to Nimenrix are marked with a check.  $m/z$  values without a  
 235 statistically significant comparison ( $P > 0.05$ ) are marked with an 'X' and are likely contributors to the VIP plot as important  
 236 features for distinguishing between falsified constituents as opposed to distinguishing the genuine vaccine from the  
 237 falsified constituents.

238

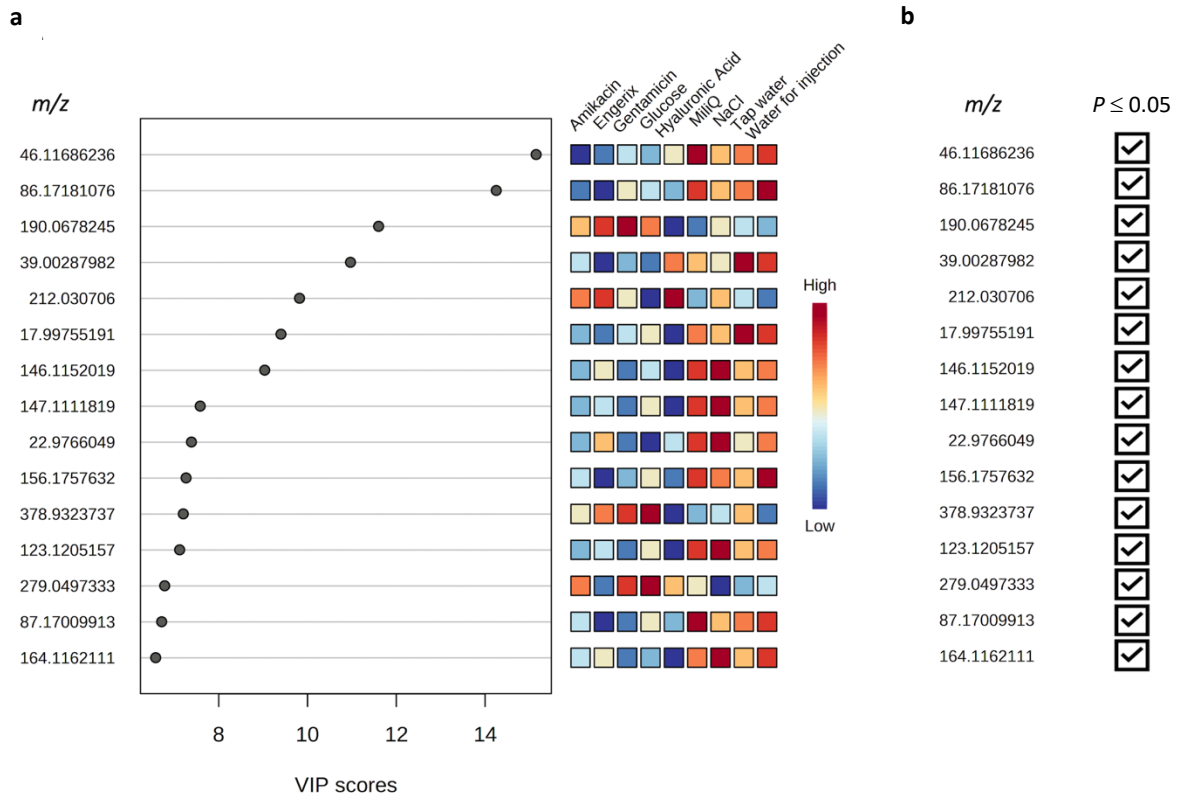

239

240 **Supplementary Figure 19.** VITEK MS analyses of compound feature significance. (a) Variable importance in the projection  
 241 (VIP) of the peaks at 0–900 *m/z* for Engerix B vaccine compared to the 8 falsified constituents. The top 15 *m/z* values are  
 242 plotted based on their VIP score. The heatmaps to the right of the plot represents the relative intensities of the *m/z* values  
 243 for each sample group averaged over the group. (b) The two-way analysis of variance with Dunnett multiple comparison test  
 244 results for the top 15 *m/z* values from the VIP analysis. *m/z* values with at least one statistically significant comparison ( $P$   
 245  $\leq 0.05$ ) for a falsified constituent compared to Engerix B are marked with a check.

246



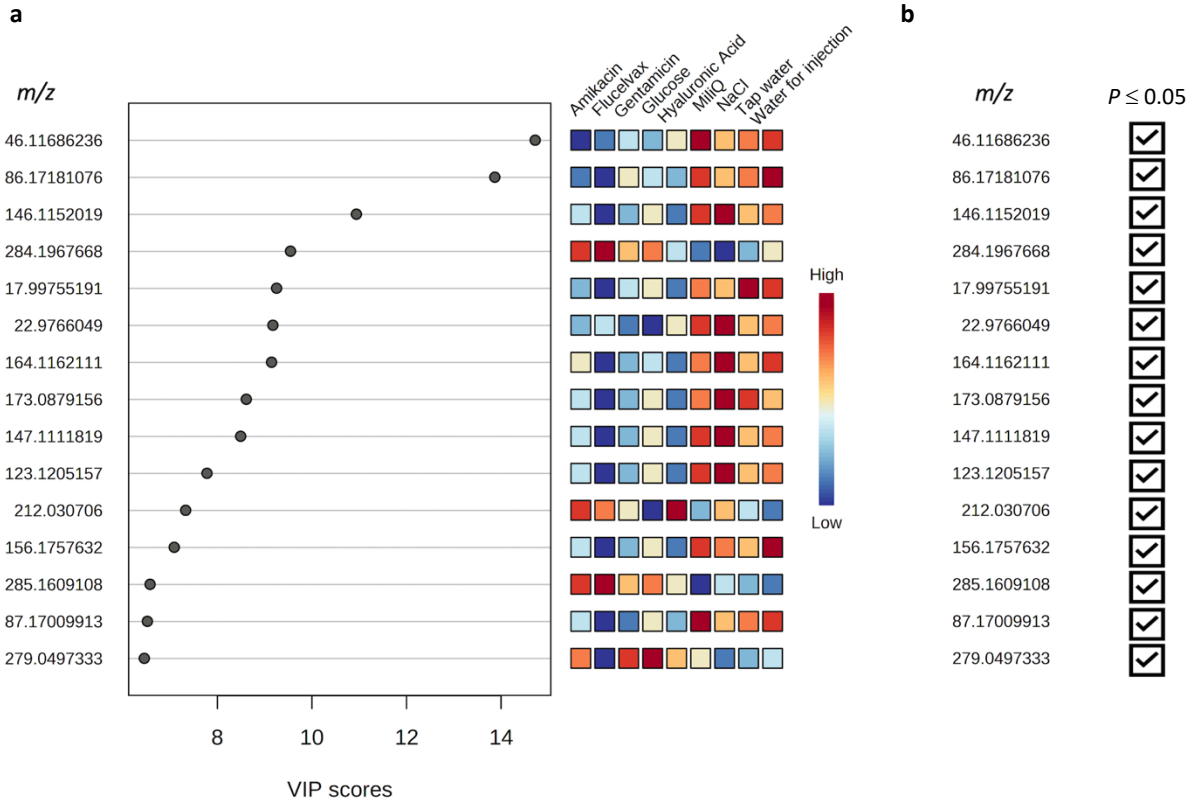

247

248 **Supplementary Figure 20.** VITEK MS analyses of compound feature significance. (a) Variable importance in the projection  
 249 (VIP) of the peaks at 0–900  $m/z$  for Flucelvac Tetra vaccine compared to the 8 falsified constituents. The top 15  $m/z$  values  
 250 are plotted based on their VIP score. The heatmaps to the right of the plot represents the relative intensities of the  $m/z$   
 251 values for each sample group averaged over the group. (b) The two-way analysis of variance with Dunnett multiple  
 252 comparison test results for the top 15  $m/z$  values from the VIP analysis.  $m/z$  values with at least one statistically significant  
 253 comparison ( $P \leq 0.05$ ) for a falsified constituent compared to Flucelvac Tetra are marked with a check.

254

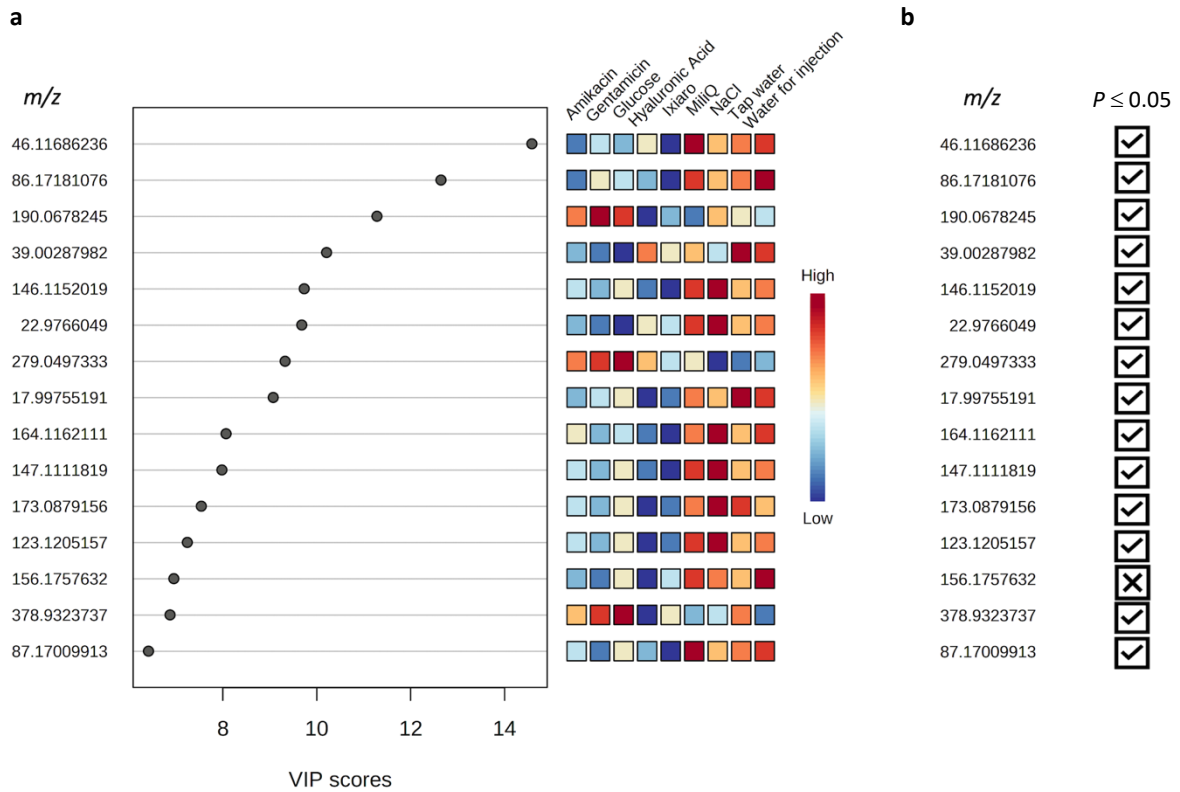

255

256

**Supplementary Figure 21.** VITEK MS analyses of compound feature significance. (a) Variable importance in the projection (VIP) of the peaks at 0–900  $m/z$  for Ixiaro vaccine compared to the 8 falsified constituents. The top 15  $m/z$  values are plotted based on their VIP score. The heatmaps to the right of the plot represents the relative intensities of the  $m/z$  values for each sample group averaged over the group. (b) The two-way analysis of variance with Dunnett multiple comparison test results for the top 15  $m/z$  values from the VIP analysis.  $m/z$  values with at least one statistically significant comparison ( $P \leq 0.05$ ) for a falsified constituent compared to Ixiaro are marked with a check.  $m/z$  values without a statistically significant comparison ( $P > 0.05$ ) are marked with an 'X' and are likely contributors to the VIP plot as important features for distinguishing between falsified constituents as opposed to distinguishing the genuine vaccine from the falsified constituents.

264

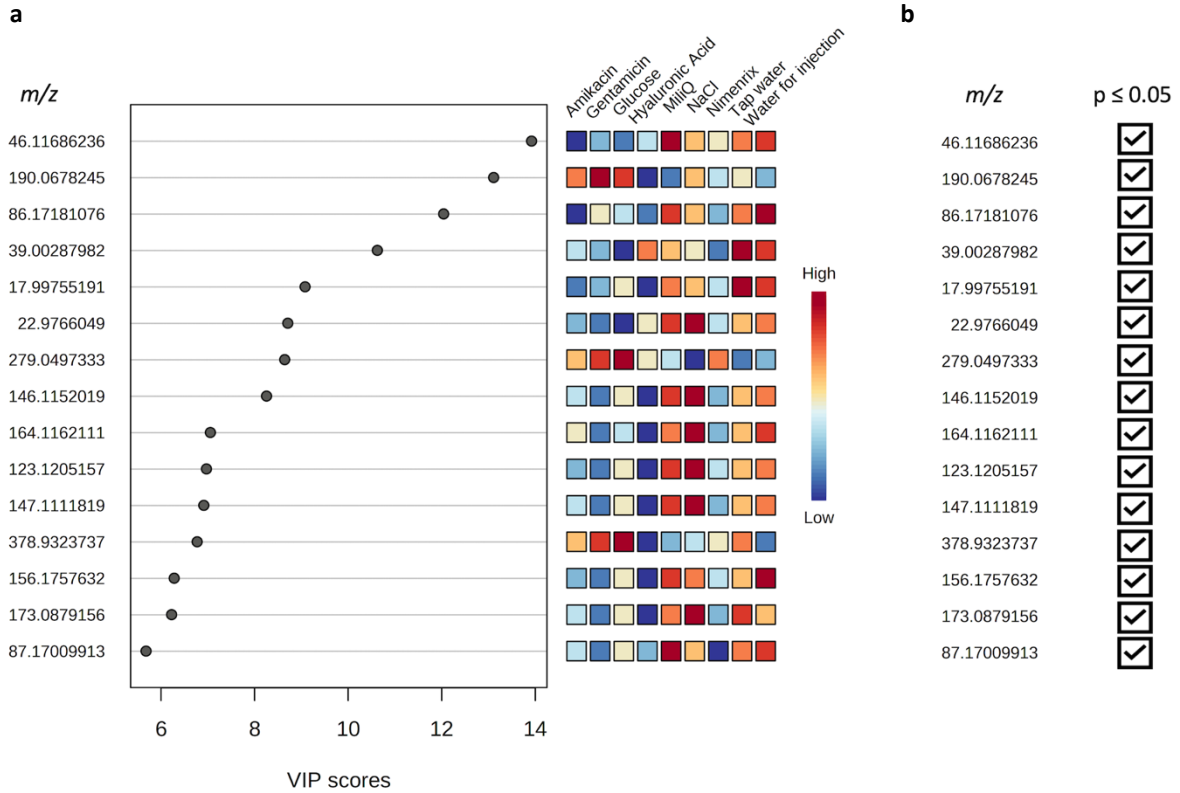

265

266 **Supplementary Figure 22.** VITEK MS analyses of compound feature significance. (a) Variable importance in the projection  
 267 (VIP) of the peaks at 0–900 *m/z* for Nimenrix vaccine compared to the 8 falsified constituents. The top 15 *m/z* values are  
 268 plotted based on their VIP score. The heatmaps to the right of the plot represents the relative intensities of the *m/z* values  
 269 for each sample group averaged over the group. (b) The two-way analysis of variance with Dunnett multiple comparison test  
 270 results for the top 15 *m/z* values from the VIP analysis. *m/z* values with at least one statistically significant comparison ( $P$   
 271  $\leq 0.05$ ) for a falsified constituent compared to Nimenrix are marked with a check.

272

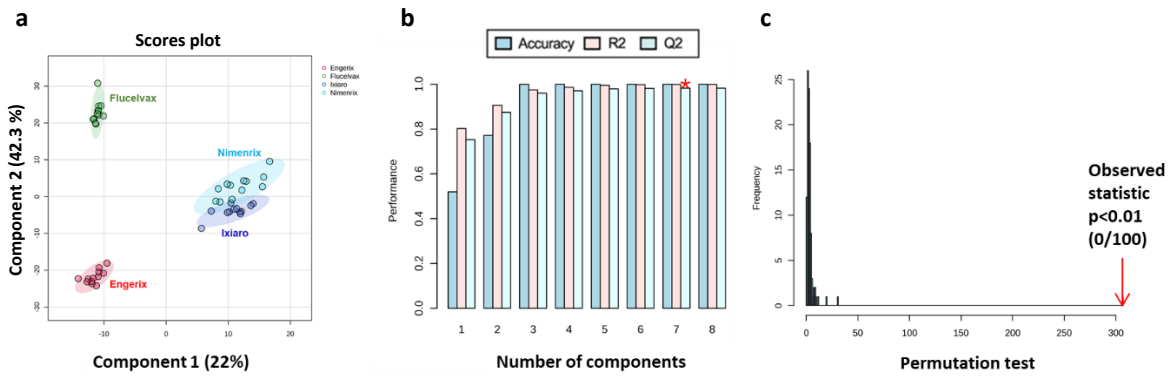

273

274 **Supplementary Figure 23.** VITEK MS partial least-squares discriminant analysis (PLS-DA) of authentic vaccines: Flucelvax  
 275 Tetra, Nimenrix, Ixiaro and Engerix. (a) PLS-DA 2D scores plot shows samples group clustering. (b) Cross validation shows a  
 276 minimum of 8 components (mass spectral peaks) are required to differentiate the experimental groups for the best Q2 value  
 277 (shown by \*). (c) Permutation testing showed the model was significant with  $p$ -value  $< 0.01$ .

278

279
